1 **Linalool acts as a fast and reversible anesthetic in *Hydra***

2 Tapan Goel<sup>§¶&</sup>, Rui Wang<sup>\*¶&</sup>, Sara Martin<sup>¶</sup>, Elizabeth Lanphear<sup>¶</sup>, Eva-Maria S. Collins<sup>§¶</sup>

3  
4 <sup>§</sup>Department of Physics, University of California San Diego, La Jolla, CA 92093, USA

5 <sup>\*</sup>Department of Bioengineering, University of California San Diego, La Jolla, CA 92093, USA

6 <sup>¶</sup>Department of Biology, Swarthmore College, Swarthmore, PA 19081, USA

7  
8 Correspondence should be addressed to Eva-Maria S. Collins; e-mail: [ecollin3@swarthmore.edu](mailto:ecollin3@swarthmore.edu);  
9 Telephone: 610-690-5380

10  
11 <sup>&</sup> These authors contributed equally.

12  
13 **Running title:** Linalool reversibly anesthetizes *Hydra*

14  
15 **Abstract**

16 The ability to make transgenic *Hydra* lines has opened the door for quantitative *in vivo* studies of  
17 *Hydra* regeneration and physiology. These studies commonly include excision, grafting and  
18 transplantation experiments along with high-resolution imaging of live animals, which can be  
19 challenging due to the animal's response to touch and light stimuli. While various anesthetics  
20 have been used in *Hydra* studies over the years, they tend to be toxic over the course of a few  
21 hours or their long-term effects on animal health have not been studied. Here we show that the  
22 monoterpene linalool is a useful anesthetic for *Hydra*. Linalool is easy to use, non-toxic, fast  
23 acting, and reversible. It has no detectable long-term effects on cell viability or cell proliferation.  
24 We demonstrate that the same animal can be immobilized in linalool multiple times at intervals  
25 of several hours for repeated imaging over 2-3 days. This uniquely allows for *in vivo* imaging of  
26 dynamic processes such as head regeneration. We further directly compare linalool to currently  
27 used anesthetics and show its superior performance. Because linalool, which is frequently  
28 utilized in perfumes and cosmetic products, is also non-hazardous to humans, it will be a useful  
29 tool for *Hydra* research in both research and teaching contexts.

30

31

## 32 **Introduction**

33 Abraham Trembley's careful and systematic studies on *Hydra* regeneration, published in his  
34 *Memoires* in 1744, brought this freshwater cnidarian into the spotlight of biological research  
35 (Lenhoff & Lenhoff 1986). *Hydra* is an optically transparent polyp a few millimeters in length. It  
36 consists of a hollow cylindrical body column with a head on one end, consisting of a ring of  
37 tentacles and a dome-shaped hypostome, and an adhesive basal disk on the other end. *Hydra* is  
38 composed of only a small number of cell types originating from three (ectodermal, endodermal  
39 and interstitial) stem cell lineages (Bode 1996). This anatomical simplicity, continuous cell  
40 turnover in the adult (Campbell 1974), and the ability to regenerate from small fragments of the  
41 body column or even from aggregates of cells (Gierer et al. 1972; Shimizu et al. 1993) render  
42 *Hydra* a powerful system for studies of development (Steele 2002), stem cell biology (David &  
43 Murphy 1977; Bosch 2009), and regeneration (Bosch 2007; Galliot et al. 2018; Cochet-Escartin  
44 et al. 2017; Petersen et al. 2015). Furthermore, *Hydra* has a relatively simple nervous system  
45 (Burnett & Diehl 1964; Bode et al. 1973), consisting of a few thousand cells (David 1973) that  
46 are organized in three neuronal networks (Dupre & Yuste 2017), making it an attractive system  
47 to study neuron development (Noro et al. 2019; Koizumi 2002) and neuronal control of behavior  
48 (Han et al. 2018; Dupre & Yuste 2017).

49  
50 Exploiting *Hydra*'s patterning processes and regenerative abilities via sophisticated excision and  
51 grafting studies has been a mainstay of *Hydra* research since Trembley's original experiments.  
52 This "cut-and-paste" approach has provided fundamental insights into *Hydra* biology. For  
53 example, the excision and subsequent threading of body column rings onto fishing line allowed  
54 researchers to probe questions about oral-aboral polarization (Ando et al. 1989). Grafting of  
55 hypostomes into body columns showed that the tip of the hypostome acts as head organizer  
56 (Browne 1909; Yao 1945) long before the head organizer was biochemically analyzed (Bode  
57 2012). Transplantation experiments were used to characterize the properties and dynamics of  
58 head inhibition (MacWilliams 1983) and estimate the length scales of head activation and  
59 inhibition (Technau et al. 2000), which helped validate the Gierer-Meinhardt model of axial  
60 patterning (Gierer & Meinhardt 1972) long before *in vivo* visualization of cells or proteins was  
61 possible in *Hydra*.

62

63 However, despite its many advantages, *Hydra* has not become a mainstream model organism like  
64 fruit flies or nematodes due to the lack of genetic tools so readily available in these organisms.  
65 This has changed in the last decade, with access to a fully assembled *Hydra* genome (Chapman  
66 et al. 2010), single cell RNAseq data (Siebert et al. 2018), and the development of molecular  
67 tools that allow for the generation of transgenic lines (Juliano et al. 2014; Glauber et al. 2015;  
68 Wittlieb et al. 2006). Because of these tools, numerous recent studies have been able to address  
69 longstanding open questions that could not previously be answered. For example, the recent  
70 creation of a transgenic line expressing GCaMP6s in the interstitial lineage allowed visualization  
71 of neural activity in real time in freely behaving animals and led to the discovery of multiple  
72 discrete networks of neurons linked to specific behaviors (Dupre & Yuste 2017). Transgenic  
73 animals have also enabled quantitative biomechanics studies to conclusively settle key biological  
74 questions, such as the mechanism driving cell sorting during regeneration from cell aggregates  
75 (Cochet-Escartin et al. 2017) and the functioning of the *Hydra* mouth (Carter et al. 2016).

76  
77 As research in the field continues to dig deeper into such questions in the living animal, studies  
78 will require ever more precise and repeatable manipulations of the animal, high resolution live  
79 imaging, or a combination of the two to fully exploit transgenic strains and other new  
80 technologies. These experimental approaches are challenged by the fact that the animal is in a  
81 continuous dynamic state of extension-contraction and responds rapidly to stimuli such as touch  
82 and light. Therefore, a reversible way of slowing or preventing the animal's movements would  
83 greatly facilitate a wide range of experiments. The search for a reliable and reversible relaxant in  
84 *Hydra* has driven the field to try an array of compounds, with the most prominent ones being  
85 urethane (Macklin 1976; Benos et al. 1977; Münder et al. 2013; Takahashi & Hamaue 2010;  
86 Buzgariu et al. 2018), heptanol (Smith et al. 2000; Rentzsch et al. 2005), and chloretone  
87 (Badhiwala et al. 2018; Lommel et al. 2017; Loomis 1955; Kepner & Hopkins 1938). Urethane  
88 and heptanol have broad effects on *Hydra*. Urethane reverses the transepithelial potential,  
89 causing adverse effects upon several hours of exposure (Macklin 1976). Heptanol blocks  
90 epithelial gap junction communication in the body column (Takaku et al. 2015). Chloretone is  
91 reportedly nervous-system specific, but *Hydra* was observed to develop tolerance to the  
92 anesthetic within hours of exposure (Kepner & Hopkins 1938). Thus, existing anesthetics have

93 serious limitations and there is an urgent need for an alternative that reliably immobilizes *Hydra*  
94 without causing tolerance or adverse health effects.

95

96 Here we report on linalool as a novel, safe and fully reversible anesthetic for *Hydra*. Linalool is  
97 a monoterpenoid alcohol found in flowers and frequently used in cosmetic products (Aprotosoiaie  
98 et al. 2014). It has previously been shown to have anesthetic or sedative activity in a range of  
99 other model systems, including mice (Linck et al. 2009), catfish (Heldwein et al. 2014), and  
100 flatworms (Boothe et al. 2017). Linalool exists in two enantiomeric forms which are known to  
101 have different pharmacological effects. In humans, the (S)-enantiomer causes an increase in heart  
102 rate while the (R)-enantiomer works as a stress relieving agent (Höferl et al. 2006). In contrast,  
103 in catfish the (S)- enantiomer acts as a sedative (Heldwein et al. 2014). Here, we demonstrate  
104 that a racemic mixture of the two enantiomers of linalool enables live imaging of *Hydra* under  
105 various mounting and lighting conditions, including the acquisition of fluorescence time-lapse  
106 movies and multichannel z-stacks at high magnification. Linalool is fast acting – a 1mM  
107 solution of linalool anesthetizes an animal within 10 min of exposure, with recovery occurring in  
108 approximately the same time after removal from the solution. Because anesthesia using linalool  
109 is reversible, the same animal can be imaged consecutively over the course of days, enabling  
110 dynamic studies of long-term processes such as head regeneration and budding. Furthermore,  
111 linalool facilitates the rapid execution of precise sample manipulations such as tissue excisions  
112 and grafting. Linalool has been reported to be a cytostatic agent in cancer cells *in vitro*  
113 (Rodenak-Kladniew et al. 2018); therefore, we also investigated this possibility in *Hydra*. We  
114 found no significant effects of prolonged (3-day) continuous linalool exposure on budding rates,  
115 mitotic activity, or cell viability. In contrast, in amputated animals 3-day continuous exposure to  
116 linalool suppressed both head and foot regeneration but could be rescued upon removal of the  
117 anesthetic. Thus, linalool may also be a useful tool for manipulating regeneration dynamics. In  
118 conclusion, we find that linalool significantly outperforms other currently used anesthetics and  
119 enables *in vivo* manipulations and live imaging of *Hydra* with precision and ease of use.

120

121

122

123

## 124 **Materials and Methods**

### 125 ***Hydra* strains and culture**

126 We used the *Hydra vulgaris* AEP strain (Martin et al. 1997; Technau et al. 2003) and various  
127 transgenic lines derived from this strain: GCaMP6s, expressing the calcium sensor GCaMP6s in  
128 interstitial cells (Dupre & Yuste 2017); Wnt, expressing GFP under control of the Wnt3  
129 promoter (Hobmayer et al. 2000); HyBra, expressing GFP under control of the HyBra2 promoter  
130 (Glauber et al. 2013); “Watermelon” (WM) animals (Glauber et al. 2013) expressing GFP in the  
131 ectoderm and DsRed2 in the endoderm with both genes under control of an actin gene promoter;  
132 and a line originating from a single animal that was obtained by recombining AEP ectoderm and  
133 watermelon endoderm following tissue separation (Cochet-Escartin et al. 2017) and named  
134 “Frank” by the undergraduate student who created it. The Frank line has unlabeled ectoderm and  
135 DsRed2-expressing endoderm. Nerve-free animals were generated by heat-shocking *H. vulgaris*  
136 strain A10. A10 is a chimeric animal consisting of *H. vulgaris* (formerly *Hydra magnipapillata*  
137 strain 105) epithelial cells and sf-1 interstitial cells (Shimizu et al. 2004a).

138

139 *Hydra* strains were maintained in mass cultures in *Hydra* medium (HM) composed of 1 mM  
140 CaCl<sub>2</sub> (Spectrum Chemical, New Brunswick, NJ), 0.1 mM MgCl<sub>2</sub> (Sigma-Aldrich, St. Louis,  
141 MO), 0.03 mM KNO<sub>3</sub> (Fisher Scientific, Waltham, MA), 0.5 mM NaHCO<sub>3</sub> (Fisher Scientific),  
142 and 0.08 mM MgSO<sub>4</sub> (Fisher Scientific) prepared with MilliQ water, with a pH between 7 and  
143 7.3. Cultures were maintained at 18°C in the dark in a Panasonic incubator (Panasonic MIR-  
144 554, Tokyo, Japan). The cultures were fed 2-3x/week with *Artemia* nauplii from the San  
145 Francisco Bay or from the Great Salt Lake (Brine Shrimp Direct, Ogden, UT). Animals were  
146 cleaned daily using standard cleaning procedures (Lenhoff & Brown 1970). Asexual, non-  
147 budding polyps starved for at least 24 h were used for experiments unless stated otherwise.

148

### 149 **Generation of nerve-free *Hydra***

150 To generate nerve-free *Hydra*, A10 polyps were heat-shocked in an incubator (Fisher Scientific  
151 615F) at 28-29°C in the dark for 72h and then moved back into the 18°C incubator (Sugiyama &  
152 Fujisawa 1978; Fujisawa 2003; Shimizu et al. 2004b). All nerve-free animals were subsequently  
153 force-fed and “burped” as described previously (Tran et al. 2017) for three to four weeks, in  
154 which time they lost nematocytes, as well as feeding and mouth opening behaviors.

155

## 156 **Preparing anesthetic solutions**

157 Stock solutions were made in HM at concentrations of 1 mM linalool (Sigma-Aldrich), 0.04%  
158 heptanol (Acros Organics, Fisher Scientific), 2% urethane (Sigma-Aldrich), or 0.1% chloretone  
159 hemihydrate (Sigma-Aldrich). Linalool and heptanol were prepared fresh daily and stored at  
160 room temperature. Urethane and chloretone solutions were stored at 4°C for a few days and pre-  
161 warmed to room temperature before usage. Anesthetic solutions were prepared at room  
162 temperature, except for chloretone, which was prepared with slight heating.

163

## 164 **Linalool viability assay**

165 24 h starved polyps were incubated in 6-well plates (Genesee Scientific, El Cajon, CA), 8 or 10  
166 animals per well in 2 mL of different concentrations of linalool (0-10 mM) at room temperature  
167 for 3 h. The fraction of live animals was scored at the end of the assay. To obtain the LC50  
168 value, the fraction of dead animals (1- fraction of live animals) was plotted against the linalool  
169 concentration. The data were fitted to the Hill equation as in (Hagstrom et al. 2015):

$$y = \frac{1}{1 + \left(\frac{LC_{50}}{x}\right)^{Hill-coefficient}}$$

170 Here, y is the fraction of dead animals and x is the concentration of linalool in millimolar. The fit  
171 was generated using the curve fitting application in MATLAB (MathWorks, Natick, MA, USA)

172

## 173 **Characterizing short term efficacy of anesthetics**

174 1-5 intact *Hydra* polyps were incubated per well in a flat bottom 6-well plate (Eppendorf,  
175 Hamburg, Germany) filled with 8mL of HM or respective anesthesia. If more than 2 polyps  
176 were used, 40 µm or 100 µm Falcon cell strainers (Fisher Scientific) were used in the well to  
177 allow for quicker transfer of the animals from HM to anesthesia and vice versa. In some  
178 experiments, all wells were imaged simultaneously and polyps were stained with neutral red  
179 (1:400,000 w/v; Fisher Scientific) in HM for 90 s at room temperature prior to the experiment to  
180 enhance contrast during imaging. The 6-well plate was imaged from the top using a Basler  
181 A601f-2 camera attached to a 25 mm TV lens C22525KP with adjustable focal length (Pentax,  
182 Tokyo, Japan) for 1 h at 1 fps using Basler pylon camera software. Lighting was provided by a  
183 model A4S light box (ME456, Amazon, Seattle, WA). After 1 h, the cell strainers were moved to

184 a new well and 8 mL of HM were added to each well. Following this, the plate was imaged for 2  
185 h. In other experiments, individual wells were imaged on a stereo microscope using a Flea-3  
186 camera (FLIR Integrated Imaging Solutions Inc, Wilsonville, OR) controlled by a custom  
187 MATLAB script. To obtain representative images at higher magnification, anesthetized *Hydra*  
188 were imaged in a 35 mm tissue culture dish with a Leica MZ16FA microscope equipped with a  
189 SPOT RT3 camera (SPOT Imaging, Sterling Heights, Michigan), using the SPOT 5.1 software  
190 (SPOT Imaging) at 15min and at 60 min exposure.

191  
192 A range of sublethal linalool concentrations (0 mM, 0.1 mM, 0.25 mM, 0.5 mM, 0.75 mM, 1  
193 mM) were tested. Working concentrations for other anesthetics were 2% urethane, 0.04%  
194 heptanol, or 0.1% chloretone, with induction imaged for at least 20 min and recovery for at least  
195 30 min. At least 10 animals were assayed for each condition, in at least 3 technical replicates.  
196 Time of induction of anesthesia was considered to be the time at which the animal stopped  
197 extending further, and time of recovery was considered to be the timing of the first contraction  
198 burst observed after returning the polyps to HM. Due to the complex behavior of *Hydra* and the  
199 subjectivity of these measures, calculated times for induction and recovery should be considered  
200 estimates rather than conclusive values.

201  
202 **Body column length of *Hydra* in anesthetics**  
203 24 h starved polyps were imaged for 10 min in HM to observe both extended and contracted  
204 states of the moving polyp to calculate an average body length  $((\text{max}+\text{min})/2)$ . The polyps were  
205 then transferred to 1 mM linalool, 2% urethane, 0.04% heptanol, or 0.1% chloretone and imaged  
206 for an additional 20 min. We averaged the minimum and maximum body lengths of *Hydra* in  
207 the last 10 min of recording in each anesthetic. Average body length in the anesthetic was  
208 divided by the average in HM to find the % body length for each anesthetic to determine whether  
209 the polyps were hyperextended ( $>100\%$ ) or contracted ( $<100\%$ ) compared to their “normal”  
210 length. Because *Hydra* doesn’t have a fixed body shape or length due to constant extension and  
211 contraction, this normal length is somewhat arbitrary; however, it nevertheless allows us to  
212 compare the effects of the various anesthetics.

213

214 **Feeding and pinch responses in linalool**



215 24 h starved polyps were incubated in 1 mM linalool for 10 min in a 60 mm tissue culture dish  
216 (VWR International, Radnor, PA). Each animal was pinched using a pair of Dumont No. 5  
217 forceps (Fine Surgical Tools, Foster City, CA) to determine presence or absence of a contractile  
218 response while in the linalool solution. To assay whether animals exhibited a feeding response in  
219 linalool, 4-day starved polyps were first incubated for 10 min in 1 mM linalool. The anesthetized  
220 animals were transferred to a stereo microscope, and video recording with a Flea-3 camera  
221 controlled by a custom MATLAB script was started. Brine shrimp were added, taking care to  
222 only add a small amount of HM when transferring the shrimp, and recording was continued for  
223 30 min. 4-day starved control animals in HM were imaged in the same way.

224

### 225 **Cross sections and “zebra grafts”**

226 48-72h starved Wnt and Frank polyps were used. Polyps were placed in the lids of 35 mm dishes  
227 in either HM or 1 mM linalool for at least 10 min. Rings of tissue were excised from the body  
228 column using a scalpel 10 blade. The rings were strung onto glass needles pulled from  
229 microcapillaries (World Precision Instruments, Sarasota, FL) using a P-1000 micropipette puller  
230 (Sutter Instrument, Novato, CA) and imaged with a Leica MZ16FA microscope equipped with a  
231 SPOT RT3 camera, using the SPOT 5.1 software. “Zebra grafts” (n=2 per condition) were  
232 created using WM and Frank animals. The animals were placed in a 100 mm petri dish  
233 (Spectrum Scientifics, Philadelphia, PA) filled with either HM or 1 mM linalool in HM. A small  
234 piece of filter paper (2x2 mm) was cut and threaded onto a size 00 enameled insect pin  
235 (Austerlitz, Carolina Biological) and the pin placed into the dish. One animal was decapitated,  
236 and the head threaded onto the pin mouth first using forceps such that the cut edge of the tissue  
237 faced towards the point of the pin. The second animal was then decapitated and the head  
238 discarded. A ring of tissue was cut as thinly as possible from the body column of the second  
239 animal and threaded onto the pin, followed by a ring from the first animal. Alternating rings of  
240 tissue were cut and placed on the pin until the body columns of both animals were used up, at  
241 which point one of the feet was threaded onto the pin to complete the chimera. A second piece  
242 of filter paper was threaded onto the pin, and forceps used to gently move the two pieces of  
243 paper together in order to force all the rings into contact with each other. These chimeras were  
244 allowed to heal on the pins for 2 h, then gently pushed off the pins with forceps, transferred to  
245 clean 35 mm dishes full of HM, and allowed to further heal overnight before imaging.



246

247 Grafting of heads into the body column was accomplished using WM and unlabeled animals  
248 using an approach similar to the insect pin method described above. The WM animal was  
249 decapitated, and a slit cut in the side of the unlabeled animal. The pin was passed through the  
250 WM head hypostome first, then through the wound in the unlabeled polyp and out through the  
251 body wall on the other side. Care was taken when positioning the filter paper pieces to avoid  
252 pushing the donor head into the body cavity. Animals were allowed to heal for 2 h, then  
253 removed from the pins and placed in dishes of clean HM to heal overnight before imaging.  
254 Grafting of head organizers into the body column was accomplished without pins. Head  
255 organizers were obtained by anesthetizing a WM animal in linalool, removing the head, then  
256 excising the tentacle bases to leave only a small fragment of tissue containing the tip of the  
257 hypostome. A small slit was cut in the body column of an unlabeled animal, and forceps used to  
258 place the hypostome piece into the slit. Animals were allowed to heal for 2 h before transfer to  
259 dishes of clean HM. Successful grafts were imaged every 24 h to determine whether an ectopic  
260 body axis was induced.

261

### 262 **Fluorescence imaging in 1mM linalool and in other anesthetics**

263 All imaging was done using an Olympus IX81 inverted microscope (Olympus Corporation,  
264 Tokyo, Japan) with an ORCA-ER camera (Hamamatsu Photonics, Hamamatsu, Japan).  
265 Slidebook software version 5.0 (Intelligent Imaging Innovations, Denver, CO) was used to  
266 interface with the microscope and acquire z-stacks and time-lapse images. Anesthesia  
267 incubations were performed as described earlier. *Hydra* expressing GCaMP6s and WM *Hydra*  
268 were used for fluorescence imaging. For low magnification single channel imaging, an animal  
269 was allowed to move freely in a drop of either HM or 1mM linalool on a 40 mm x 24 mm glass  
270 coverslip (Fisher Scientific) and was imaged in the GFP channel with a 50ms exposure using a  
271 4x UPLFLN objective (Olympus). Images were recorded every 100ms for 10s to obtain a time  
272 lapse movie. Rigid body correction of z-stacks was accomplished using a previously described  
273 algorithm (Thévenaz et al. 1998). For high-magnification single channel imaging, animals were  
274 mounted in tunnel slides prepared as described in (Carter et al. 2016). Neurons in the body  
275 column of GcaMP6s animals were imaged by taking z-stacks of the tissue in the GFP channel  
276 (500ms exposure; z-step size of 0.25  $\mu\text{m}$ ), using a 60x oil immersion objective.

277

278 For low-magnification multi-channel imaging, WM animals were incubated in Hoechst 33342  
279 (Thermo-Fisher Scientific) diluted 1:500 in 1mM linalool for 15 minutes in the dark. The  
280 animals were then decapitated and the hypostome mounted in a tunnel slide. Z-stacks were taken  
281 in DAPI, GFP and RFP channels with a step size of 2.99  $\mu\text{m}$  using a 10x objective. For high-  
282 magnification multi-channel imaging, RWM animals were first incubated in SYTO 60 red  
283 fluorescent nucleic acid stain (Invitrogen) diluted to 10  $\mu\text{M}$  in HM for 1 h at room temperature in  
284 the dark. 2 quick washes in 1mL HM followed, as well as a 15 min incubation in the dark at  
285 room temperature in 1:250 Hoechst 33342 diluted in 1mM linalool. Body columns of the animals  
286 were imaged in the DAPI, RFP and DRAQ5 channels with a 60x oil immersion objective. For  
287 high magnification two-channel imaging, Hoechst 33342 (Thermo-Fisher Scientific) was diluted  
288 1:500 in 1 mL of the respective anesthetic solution and WM animals were incubated for 15 min  
289 at room temperature in the dark. Individuals were mounted on tunnel slides and imaged.

290

### 291 **Regeneration and budding assays**

292 Polyps were decapitated with a scalpel just below the tentacle ring for head regeneration and  
293 above the budding zone for foot regeneration assays. In one experiment, the decapitated animals  
294 were placed in 600  $\mu\text{L}$  of 0 mM (control), 0.1 mM, 0.25 mM, 0.5 mM, 0.75 mM, or 1 mM  
295 linalool in HM. Head regeneration was scored by the appearance of the first tentacle on a  
296 decapitated animal. 8 animals were kept at each concentration in a 48-well plate (Eppendorf) and  
297 imaged in brightfield at 4x with an Invitrogen EVOS Fl Auto 2 (Thermo-Fisher Scientific,  
298 Waltham, MA). Head regeneration was scored every 12 h for 72 h. The lid of the plate was  
299 removed for imaging and the solutions were changed every 24 h. In another experiment,  
300 decapitated polyps were placed individually into the wells of a 24-well plate (Eppendorf), filled  
301 either with 500  $\mu\text{l}$  HM or 1 mM linalool. Polyps were imaged approximately every 12 h and the  
302 appearance of tentacles and hypostomes were scored. After approximately 3 days, polyps were  
303 transferred into a new 24-well plate containing 500  $\mu\text{l}$  fresh HM and imaged a day after transfer.  
304 Foot regeneration experiments were conducted the same way, with animals scored for the  
305 appearance of a peduncle and for the ability to adhere to the substrate. For repeated imaging of  
306 head regeneration at high magnification, animals were anesthetized in 1 mM linalool for 10 min  
307 prior to imaging and returned to HM to recover afterwards. To facilitate removal from the slides,

308 a layer of Scotch tape was placed over the double-sided tape during construction of tunnel slides.  
309 The increased space between coverslip and slide and ability to easily lift off the coverslip after  
310 imaging allowed recovery of the animal with minimal chance of injury.

311  
312 Budding was assessed by selecting healthy animals with early buds at stages 3-4 on the  
313 previously described scale (Otto & Campbell 1977), and incubating them in well plates as  
314 described for regeneration assays. Animals were scored for development of tentacles on the bud  
315 and formation of further buds. Long-term imaging of budding was carried out in 35 mm glass  
316 bottomed dishes (MatTek, Ashland, MA). One animal was placed onto the glass surface at the  
317 bottom of the dish in 1 mM linalool, a coverslip was laid over the top to constrain the animal,  
318 and the dish was flooded with 1 mM linalool. Animals were imaged once per hour for 48 h  
319 using an Invitrogen EVOS FL Auto microscope.

320

### 321 **Cell viability assay**

322 Polyps were incubated for 30 min in 1  $\mu\text{g}/\text{mL}$  propidium iodide in HM, washed twice in HM,  
323 then mounted on glass slides as described for live imaging of neurons. Slides were imaged on an  
324 Invitrogen EVOS FL Auto microscope in the red fluorescence channel using the Invitrogen  
325 EVOS FL Auto Imaging System software. Labeled cells were counted in the body column only  
326 and reported as number of labeled cells per animal. As a positive control, polyps were incubated  
327 in 0.04% colchicine (Acros Organics) in HM to induce cell death (Cikala et al. 1999). Animals  
328 were incubated in colchicine for a full 24 h rather than 8 h incubation followed by 16 h recovery  
329 as described.

330

### 331 **Mitotic index assay**

332 Polyps were incubated in HM or 1 mM linalool for 72 hours in 60 mm cell culture dishes at a  
333 density of 1 polyp/mL. Polyps were not fed during the experiment, but the medium was changed  
334 daily. At the end of the 72 h, one or two cross sectional segments were cut from the body column  
335 of each polyp near the head. The samples were placed on glass slides for a wet mount antibody  
336 stain. Humid chambers for staining were constructed by lining covered 100 mm Petri dishes  
337 (Spectrum Scientific) with wet paper towels and placing the slides inside the dishes. A well was  
338 created in the center of each glass slide by layering two pieces of double-sided tape across both

339 short sides of the slide with one piece of tape running on both long edges of the slide. The  
340 samples were placed in a drop of medium on the slide. All steps were performed at room  
341 temperature unless otherwise noted. The samples were fixed in 20  $\mu$ L 4% paraformaldehyde  
342 (Sigma-Aldrich) in HM for 15 min. The samples were washed three times with 20  $\mu$ L 1x PBS,  
343 followed by a 15 min permeabilization with 20  $\mu$ L 0.5% PBSTx (0.5% Triton-X in 1x PBS).  
344 They were then incubated for 3.5 h in 20  $\mu$ L blocking solution (1% FBS, 0.1% DMSO in 1x  
345 PBS) and placed overnight (16h) at 4°C in 30  $\mu$ L anti-phospho-histone H3 (Ser10) primary  
346 antibody (Millipore Sigma, Burlington, MA) diluted 1:100 in blocking solution. On the second  
347 day, samples were washed quickly 3x with 40  $\mu$ L 1x PBS, followed by four 25-35 minute  
348 washes of 20  $\mu$ L 0.3% PBSTx. The samples were then incubated in a 1:1000 dilution of Alexa  
349 546 rabbit IgG secondary antibody (Thermo-Fisher Scientific) for 5 h, followed by three quick  
350 and two 10 min washes of 0.3% PBSTx. To stain nuclei, the samples were incubated in DRAQ5  
351 (Thermo-Fisher Scientific) diluted to 5  $\mu$ M in 1x PBS for 15 min and then washed three times  
352 with 1x PBS. The 1x PBS was replaced with a 1:1 solution of glycerol and HM. Finally, a cover  
353 slip was placed over the samples and nail polish was used to seal the slides. Z-stacks of the  
354 cross-sections were imaged using a Leica high-resonance scanning SP5 confocal microscope  
355 with a 20x C-Apochromat 1.2 W objective.

356  
357 To calculate mitotic indices, the number of Alexa 546 stained nuclei was counted for each cross  
358 section, divided by the number of nuclei stained by DRAQ5 and multiplied by 100 to obtain a  
359 percentage. Counting of Alexa 546 and DRAQ5 stained nuclei was done using Fiji (Schindelin et  
360 al. 2012). For the z-stack corresponding to each color channel, a maximum intensity z-projection  
361 was taken and binarized. The projection was then segmented using the water-shedding tool. The  
362 number of particles was counted using the *Analyze Particles* tool, with a size range of 10-  
363 infinity  $\mu$ m<sup>2</sup>. For Alexa 546 color channel stacks, an additional thresholding step was used  
364 before binarizing the image.

365

366

367

## 368 **Results**

### 369 **Linalool is a fast acting and reversible anesthetic**

370 Intact polyps in HM continuously exhibit body shape changes and tentacle movements,  
 371 contracting, extending, and bending, which greatly complicates *in vivo* manipulations and  
 372 imaging. In contrast, animals incubated in 1mM linalool for 10 min appear relaxed, with  
 373 tentacles splayed out and the mouth assuming a conical shape (Fig.1 A).

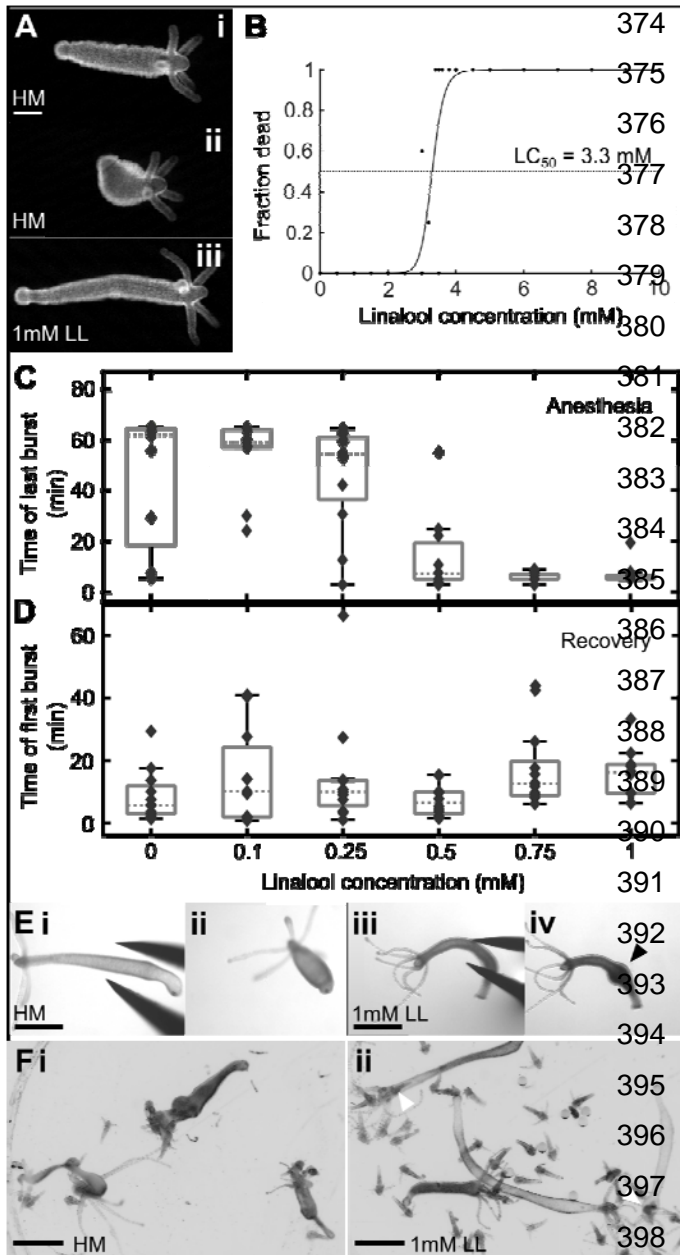

**Figure 1. Linalool as an anesthetic.** A.

Representative images of *Hydra* polyps before (i, extended, ii, contracted) and after (iii) incubation in 1 mM linalool (abbreviated to LL). Scale bar: 200  $\mu$ m. B. 3 hour incubation in linalool

concentrations exceeding 2 mM causes lethality. C. Box plot showing time of last observed contraction burst during 60 min incubation in linalool concentrations up to 1 mM. D. Box plot showing time of first observed contraction burst during 60 min

recovery in HM following 1h of anesthesia in linalool. E. Pinch response. i. *Hydra* polyp in HM. ii. Polyp in HM shows a contractile response to pinching. iii. *Hydra* polyp incubated in 1 mM linalool

for 10 min. iv. Anesthetized polyp shows only local swelling after pinch, indicated by black arrowhead. F. 30 min feeding response in 4-day starved polyp. i. *Hydra* polyps in HM readily capture and consume multiple shrimp. ii. *Hydra* polyps incubated in linalool for 10 min prior to

introduction of shrimp have a much reduced reaction, and only rarely ingest shrimp. White arrowheads indicate shrimp inside polyps. Scale bars for E, F: 1 mm.

399 introduction of shrimp have a much reduced reaction, and only rarely ingest shrimp. White arrowheads  
 400 indicate shrimp inside polyps. Scale bars for E, F: 1 mm.

401

402 We investigated the effect of various linalool concentrations on animal health within 3 hours of  
403 incubation (Fig.1B) and found that concentrations exceeding 2 mM caused negative health  
404 effects on the animals, such as an abnormal body shape, contracted tentacles, and partial  
405 disintegration. Death was observed at concentrations of 3 mM and beyond following 3h  
406 exposure. We determined the  $LC_{50}$  to be 3.3 mM using the same approach as in (Hagstrom et al.  
407 2015). We then empirically determined the optimal working concentration for linalool by  
408 measuring and comparing induction and recovery times for different sublethal concentrations.

409  
410 No negative health effects were observed at or below 1mM linalool. Induction time of  
411 anesthesia decreased with increasing concentration of linalool to about 10 min at 1mM (Fig 1C)  
412 while recovery time remained constant (Fig. 1D) at 10-20 min for all concentrations tested.  
413 Therefore, we determined that the highest tolerated dose, 1mM, was the best concentration to use  
414 in experiments. Polyps incubated in 1mM linalool for at least 10 min no longer exhibit the  
415 “pinch response”, a global longitudinal contraction, that is observed in HM upon gently  
416 squeezing the body column with forceps (Fig.1 E i). Polyps in 1 mM linalool swelled at the site  
417 of pinching but did not contract (Fig.1E ii). Thus, linalool causes *Hydra* to lose both spontaneous  
418 body column contractions and mechanically induced ones. Mechanically induced body column  
419 contractions are known to be mediated by the ectodermal epithelial layer, and nerve-free animals  
420 retain their pinch response despite lacking spontaneous contraction behaviors (Takaku et al.  
421 2015). The loss of both upon treatment with linalool suggests that linalool affects both the  
422 neuronal and the epithelial cells. However, 1mM linalool does not completely paralyze the  
423 animal, as we observed that a few anesthetized individuals were able to capture and ingest  
424 shrimp, although very inefficiently compared to controls (Fig.1 F).

425

### 426 **1 mM linalool enables precise tissue manipulations**

427 Recent studies have shown that the regeneration outcome in *Hydra* could be influenced by the  
428 geometry of tissue pieces excised from the body column (Livshits et al. 2017). To test whether  
429 linalool allowed for improved precision of cuts and thus would be a useful tool for such studies,  
430 we compared the excision of tissue rings from animals incubated in HM with those incubated in  
431 1 mM linalool. When sectioning animals to obtain pieces of body column tissue, the application  
432 of linalool does not drastically improve minimum possible slice thickness. However, it



433 significantly reduces the working time required, from approx. 3 min to 30 s per animal (Fig. 2A).  
434 This is due to the suppression of the animal's natural contractile response to touch, removing the  
435 need to wait for the polyp to extend following each cut.

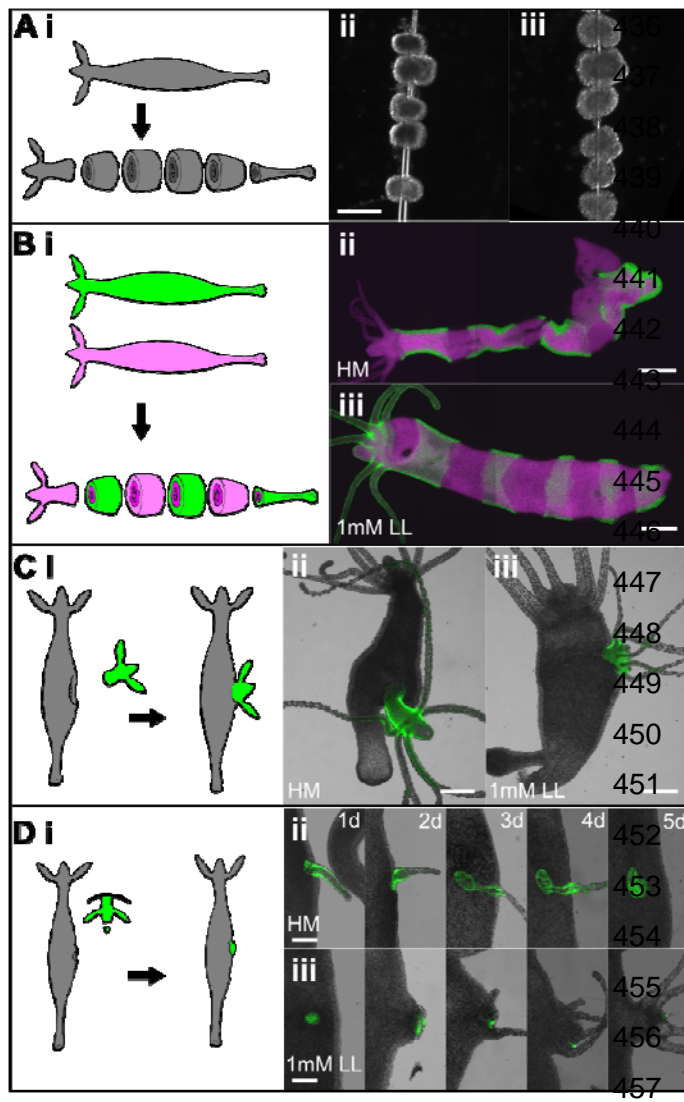

**Figure 2. Linalool improves outcomes of surgical manipulations in *Hydra*.** A.

Sectioning of body column. i. Experimental schematic. ii. Sections cut in HM. Slices have average thickness  $(197 \pm 7) \mu\text{m}$  (mean  $\pm$  std) and took about 2 min 51s per animal averaged over 3 animals. iii. Sections cut in linalool. Slice thickness  $178 \pm 4 \mu\text{m}$ , average time 36s over 3 animals. Scale bar: 400  $\mu\text{m}$ .

B. "Zebra grafting". i. Experimental schematic. ii. Representative animal grafted and healed in HM. iii. Representative animal grafted and healed in linalool. Scale bars: 400  $\mu\text{m}$ . C. Head transplantation into gastric region. i. Experimental schematic. ii.

Representative animal grafted and healed in HM. iii. Representative animal grafted and healed in 1mM linalool. Scale bars: 400  $\mu\text{m}$ .

D. Head organizer transplantation into gastric region. i. Experimental schematic. ii. Animal grafted in HM imaged over 5 days. iii.

Animal grafted in 1 mM linalool imaged over

458 5 days. Scale bars: 200  $\mu\text{m}$ .

459

460 The improvements possible using linalool become more readily apparent in grafting experiments.

461 A "zebra graft" to create a chimeric animal consisting of bands of differently labeled tissue

462 produced a significantly better result when linalool was employed (Fig. 2B). Linalool incubation

463 roughly halved the time required to cut the rings of tissue and thread them onto the needle, but

464 the true benefit is in immobilization of the tissue during the initial 2 hour healing step on the

465 needles. Grafts looked similar immediately after their creation but animals grafted in HM had



466 abnormal morphology immediately apparent on removal from the needles (Fig. 2B ii, iii). This  
467 is likely due to tissue movement causing the cut edges of the pieces to become misaligned while  
468 on the needle, thus preventing the segments from healing smoothly together as described  
469 previously (Shimizu & Sawada 1987). A similar effect was observed when grafting heads onto  
470 body columns (n=3 per condition), as previously described (Rand et al. 1926). Linalool allowed  
471 more precise decapitation of the donor animal, reducing the amount of extraneous body column  
472 tissue, and guaranteed better positioning of the graft on the recipient animal. Grafts carried out  
473 in HM tend to have the donor head protruding at an angle, again due to misalignment of the cut  
474 surfaces during healing (Fig. 2C). Finally, linalool improves overall outcome in hypostome  
475 grafts carried out as previously described (Broun & Bode 2002). Grafts in HM incorporated  
476 tissue that formed only an ectopic tentacle before being resorbed (Fig. 2D ii) or resulted in an  
477 entire head formed from donor tissue (data not shown). Grafts in linalool resulted in formation  
478 of an ectopic body axis from recipient tissue, with donor tissue limited to a small part of the new  
479 head (Fig. 2 Diii), as previously described (Browne 1909; Broun & Bode 2002).

480

#### 481 **Incubation in 1 mM linalool enables high-quality fluorescence short-term imaging**

482 To test whether the immobilization in 1 mM linalool was sufficient to allow for *in vivo*  
483 fluorescence imaging, we imaged animals incubated in 1mM linalool under various conditions  
484 and compared the results to those obtained from imaging animals in HM. First, we used single  
485 channel fluorescent imaging using polyps expressing GCaMP6s in the interstitial cell lineage  
486 (Dupre & Yuste 2017), because this transgenic line allows for the visualization of individual  
487 neurons and subcellular processes such as dendrites. Because GCaMP6s animals were originally  
488 developed to study neuronal control of behavior in *Hydra*, we imaged unconstrained animals at  
489 low magnification (Fig. 3A, Movie S1). Unconstrained animals in HM moved significantly  
490 during the 10 s acquisition, as shown by a maximum intensity projection of the time series (Fig.3  
491 A ii). In contrast, polyps incubated in 1 mM linalool for at least 10 min only exhibited drift  
492 (Fig.3 A iv, v), which can be corrected for with standard post-processing methods (Fig. 3A vi),  
493 whereas these methods do not correct for the motion observed in the control, because the animal  
494 exhibits non-linear body shape changes (Fig. 3A iii).

495

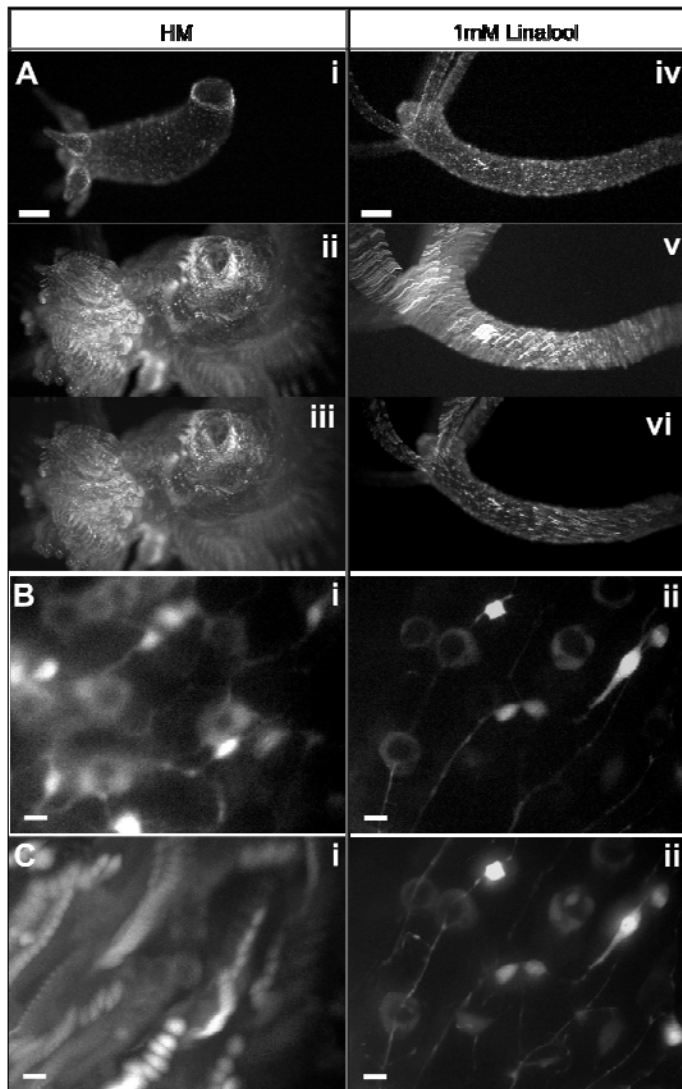

496  
497 **Figure 3. Live imaging in linalool.** A. Unconstrained GCaMP6s *Hydra* imaged at low magnification. i.  
498 single image in HM. ii. Maximum intensity Z-projection of a 10 s video in HM. iii. Rigid body  
499 correction of HM video projection. iv. Single image in 1 mM linalool. v. Maximum intensity Z-  
500 projection of 10 s video in linalool. vi. Rigid body correction of linalool video projection. Scale bars:  
501 200  $\mu\text{m}$ . B. Single slice from a z-stack of a GcaMP6s animal imaged at 60x magnification with a  
502 resolution of 0.25  $\mu\text{m}$  along the z-axis at a 200 ms exposure per slice using blue excitation in (i) HM and  
503 (ii) 1 mM linalool. C. Maximum intensity projection of high magnification z-stacks in (i) HM and (ii) 1  
504 mM linalool. Scale bars: 10  $\mu\text{m}$ .

505

506 We also acquired 20  $\mu\text{m}$  thick z-stacks of the body columns of intact polyps mounted in tunnel  
507 slides (Carter et al. 2016) at high magnification (Fig. 3B, C). The image quality of individual  
508 slices was better when imaging anesthetized animals (Fig. 3B), but the difference in stability and

509 thus image quality becomes most evident when comparing maximum intensity projections of the  
510 entire z-stack (Fig. 3C). The animal in linalool is sufficiently still to allow the resolution of  
511 subcellular features such as neuronal processes, whereas the animal in HM moves too much,  
512 making z-stacks impractical (Fig. 3C and Movie S2). As the tissue stretches and compresses  
513 anisotropically during those movements, it is not possible to correct this motion through post-  
514 processing.

515  
516 Next, we tested the performance of 10 min incubation in 1mM linalool for the acquisition of  
517 multi-channel z-stacks at low (10x) and high magnification (60x). Control videos in HM were  
518 not attempted due to the unsatisfactory results obtained in a single channel (Fig. 3). By exposing  
519 animals to 1mM linalool in the presence of 2mM reduced glutathione, we were able to induce  
520 mouth opening (Fig.4A). The animal is sufficiently still to allow for simultaneous visualization  
521 of nuclei positions and cell boundaries. We also took 3-channel time-lapse movies of heads  
522 exposed to reduced glutathione below the activation threshold for opening to illustrate the overall  
523 stability that can be achieved using linalool, allowing for co-localization studies of dynamic  
524 processes (Movie S3). Finally, we tested whether animals were sufficiently immobile to obtain  
525 high quality z-stacks in multiple channels. While motion is not completely suppressed in linalool  
526 and extended exposure to short wavelength light causes the animal to escape the field of view, it  
527 is possible to achieve high quality multichannel imaging (Fig. 4B). Thus, linalool is a useful tool  
528 for *in vivo* co-localization studies. Notably, when testing live dyes, we found that the SYTO 60  
529 red fluorescent nucleic acid stain is specific to nematocysts of all types in *Hydra*, determined by  
530 comparing morphology of stained structures to previous descriptions of nematocyst types (Engel  
531 et al. 2002).

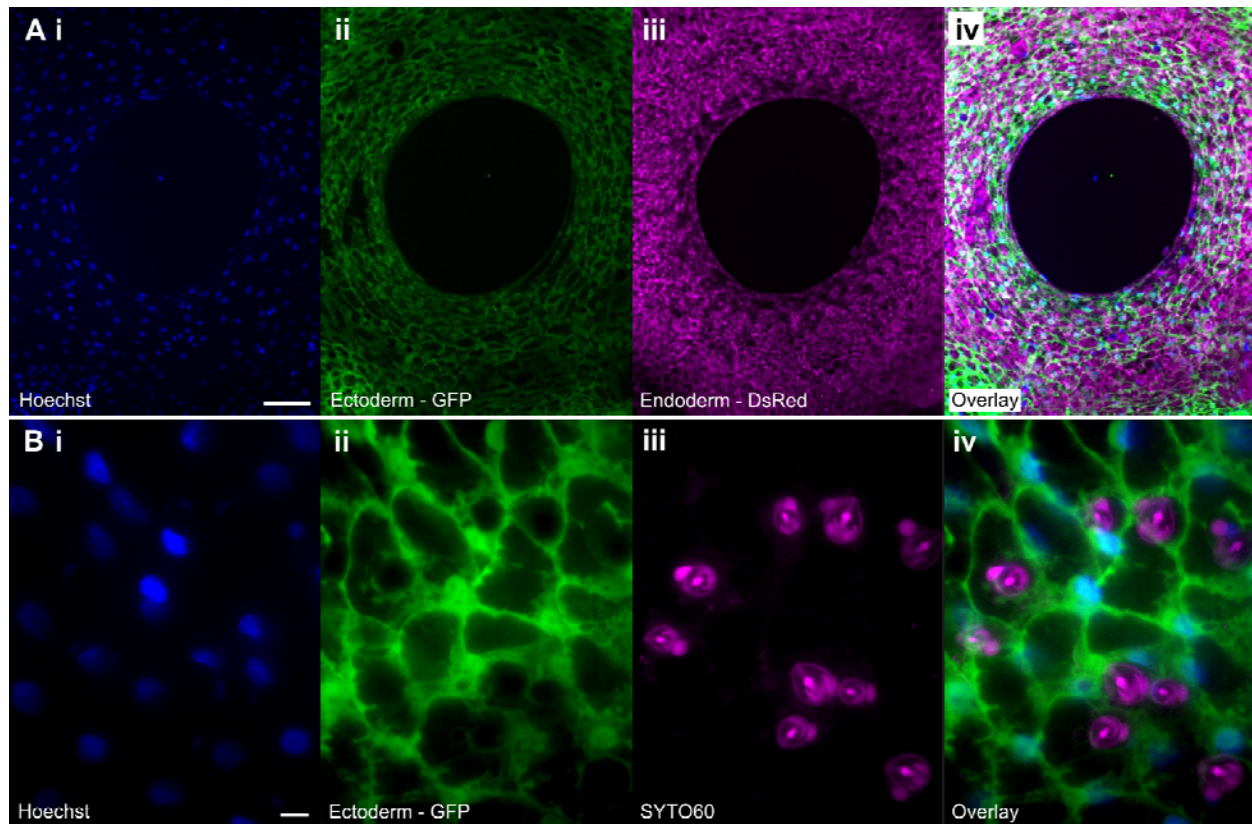

532

533 **Figure 4. Linalool enables high resolution imaging in multiple channels.** A. Low magnification  
534 maximum intensity projection of a z-stack acquired of an open *Hydra* mouth using i. Hoechst 33342 , ii.  
535 Ectoderm - GFP, iii. Endoderm – DsRed2, iv. overlay. 5  $\mu$ m slice thickness, 6 slices total. Scale bar: 100  
536  $\mu$ m. B. High magnification maximum intensity projection of a z-stack of the body column using i.  
537 Hoechst 33342, ii. Ectoderm – GFP, iii. Nematocysts – SYTO 60, iv. overlay. 0.25  $\mu$ m z-step, 17 slices  
538 total. Scale bar: 10  $\mu$ m.

539

#### 540 **Repeated fluorescent short-term imaging**

541 A major strength of linalool as a reversible anesthetic is the ability to repeatedly anesthetize and  
542 image the same animal over the course of days, thus allowing the acquisition of dynamic data of  
543 cellular processes in a single animal. To illustrate this capability, we decapitated transgenic  
544 HyBra2 promoter::GFP animals and allowed them to regenerate in HM. We imaged head  
545 regeneration over the course of 2 days, using repeated short-term 15 min incubations in 1mM  
546 linalool to acquire a total of 11 high resolution images of the same animal (Fig. 5A). When not  
547 imaged, the regenerating animals were returned to HM. In this way we were able to observe the  
548 development of the hypostome and tentacles and also to observe a gradual increase in GFP signal

549 beginning at 24h. The same technique of repeated linalool exposure was used to image the tissue  
550 grafts in Figure 2.

551

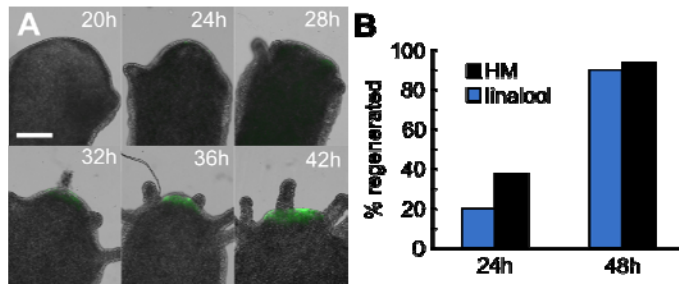

552

553

554 **Figure 5. Linalool enables repeated high resolution imaging.** A. Head regeneration in a transgenic  
555 HyBra2 promoter::GFP polyp imaged at high resolution every 4h from 12h to 48h. Subset of images  
556 shown. Scale bar: 0.5 mm B. Repeated anesthesia and recovery does not impact regeneration speed or  
557 outcome (n=10 animals HM, n=16 animals linalool, N=3 technical replicates). Differences between  
558 conditions not statistically significant at p=0.05 level.

559

560 We also confirmed that the timing and outcome of head regeneration in animals repeatedly  
561 anesthetized for imaging does not significantly differ from that observed in untreated controls.  
562 (Fig 5B). Thus, linalool is a valuable tool for repeated live imaging applications, which will be  
563 useful to study long term processes during regeneration and budding.

564

### 565 **Long-term applications of linalool**

566 Due to the reported cytostatic effect of linalool on cancer cells in culture, (Rodenak-Kladniew et  
567 al. 2018) we investigated whether linalool has similar effects in *Hydra*. The cell cycle lengths in  
568 interstitial and epithelial cells are approximately 1 (Campbell & David 1974) and 3 days (David  
569 & Campbell 1972), respectively. Therefore, we continuously incubated intact polyps for 3 days  
570 in 1 mM linalool, exchanging the solution every 24 hours to account for volatility. We neither  
571 observed significant changes in mitosis (Fig 6A) nor in cell death (Fig. 6B) in the body column  
572 of intact polyps. Furthermore, budding seemed to occur normally, as verified using 3-day  
573 continuous time-lapse imaging (Fig. 6C, Fig. S1) and budding rates of polyps in 1 mM linalool  
574 were comparable to those of controls (Fig. 6D). Based on these results, we attempted to image  
575 head regeneration in 1 mM linalool. This would be advantageous compared to consecutive



576 mounting and imaging sessions as it would minimize interaction with the sample and could be  
 577 fully automated. However, we found that decapitated *Hydra* were unable to regenerate heads in 1  
 578 mM linalool when continuously exposed over the course of 3 days. Anesthetized body columns  
 579 were observed to shed cells and assume a lollipop shape (Fig. 6E i, ii), and a few animals  
 580 disintegrated completely. If removed from linalool after 3 d, however, the surviving animals  
 581 recovered. Tentacle buds were observed as early as 1 day into recovery and all polyps had fully  
 582 regenerated their heads after 3d of recovery. (Fig. 6E).

583

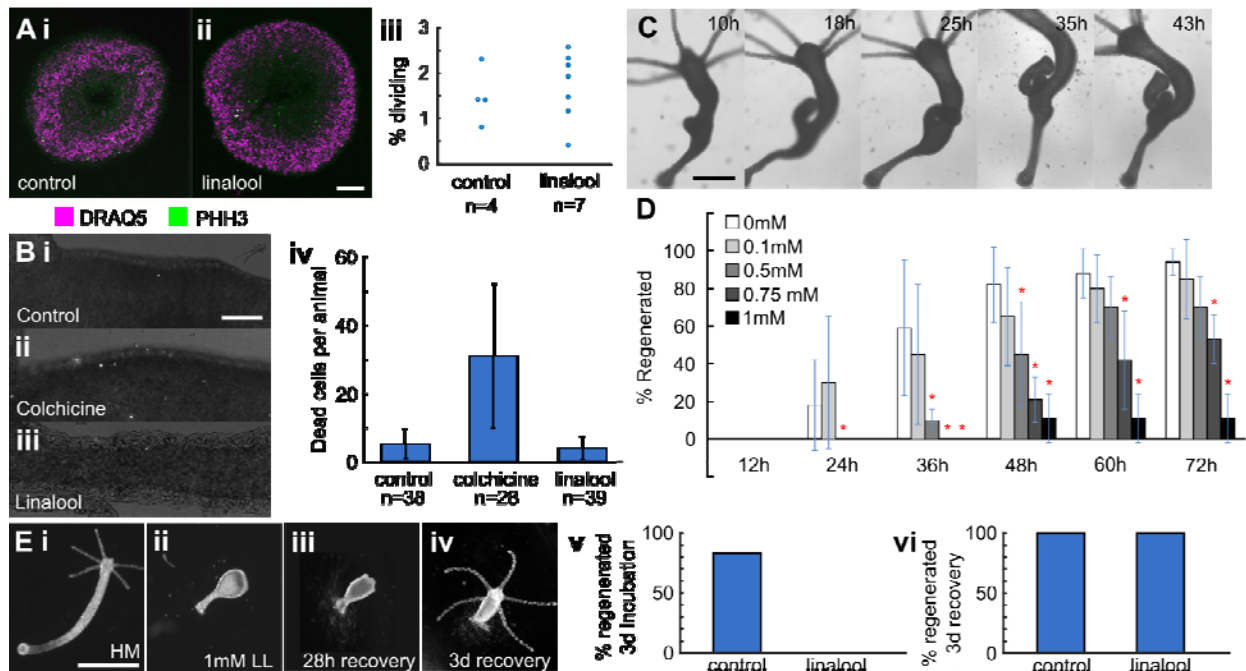

584

585 **Figure 6. Effect of long-term continuous linalool exposure.** A. 3 day incubation in 1 mM linalool does  
 586 not impact rate of cell division. i. Representative image of body column sections from polyps incubated  
 587 3 days in HM. ii. Representative slice from polyps incubated 3 days in 1 mM linalool. Slices stained with  
 588 DRAQ5 (nuclei) and anti-PH3 (phospho-histone H3, dividing cells). iii. Percentage of dividing cells in  
 589 animals incubated 3 d in HM (control) or 1mM linalool. Mean ± standard deviation: control = 1.5 ± 0.6,  
 590 linalool = 1.5 ± 0.7. Scale bar: 100 µm B. 3 day incubation in 1 mM linalool does not damage or kill  
 591 cells. Representative images of polyps stained with propidium iodide after incubating for i. 3 days in  
 592 HM, ii. 24 h in 0.04% colchicine, and iii. 3 days in 1 mM linalool. iv. Mean number of dead cells per  
 593 animal. Error bars represent standard deviations. Scale bar: 100 µm C. Long term incubation in linalool  
 594 does not impact budding. Representative images of a budding polyp continuously incubated and imaged  
 595 in 1 mM linalool. Scale bar: 500 µm D. Long term incubation in linalool prevents head regeneration.  
 596 Error bars represent standard deviations (0mM n=17, 0.1mM n=20, 0.5mM n=40, 0.75mM n=19, 1mM

597 n=19; 3 technical replicates). Red asterisks indicate statistically significant difference from 0 mM as  
598 determined using Fisher's Exact Test. E. Recovery in HM rescues the head regeneration defect. i. Polyp  
599 incubated in HM for 68 h after decapitation. ii. Polyp incubated in 1 mM linalool for 68 h after  
600 decapitation. iii. Decapitated polyp recovered for 28 h after 3 d in 1mM linalool, iv. Polyps recovered for  
601 3 d after 3 d in 1mM linalool. Scale bar: 1 mm. v. Head regeneration is prevented by incubation for 3 d  
602 in 1 mM linalool, n=12. vi. Head regeneration in animals incubated in linalool for 3 d followed by  
603 recovery in HM for 3 d, n=6.

604

605 The negative effect of continuous linalool exposure on head regeneration was observed for  
606 concentrations as low as 0.5 mM (Fig. 6D). At 0.75 mM, 50% of the animals did not regenerate  
607 heads within 3 days. At 0.25 mM or lower, animals regenerated heads similarly to the control;  
608 however, these concentrations were ineffective in immobilizing animals for long-term imaging  
609 (data not shown). Foot regeneration was similarly suppressed under continuous 1 mM linalool  
610 exposure (Fig. S2), showing that the effects of linalool on regeneration are not specific to the  
611 head.

612

613 Finally, we tested whether the inhibition of regeneration is caused by an effect on the nervous  
614 system, as it had previously been suggested that the nervous system plays a role in head  
615 regeneration (Miljkovic-Licina et al. 2007). To this end, we generated nerve-free animals as  
616 described in Methods and assayed head regeneration in 1 mM linalool. Surprisingly, nerve-free  
617 animals in 1 mM linalool regenerated similar to the controls maintained in HM. After 4 days of  
618 regeneration, 5/7 animals in HM and 3/7 in linalool showed tentacle buds. By 5 days this had  
619 increased to 7/7 in HM and 5/7 in linalool (Fig. S3). Furthermore, nerve-free animals in linalool  
620 never assumed the lollipop shape (Fig. 6E ii) that we observed in enervated polyps. Together,  
621 these data suggest that linalool disrupts regeneration by perturbing the function of either neurons  
622 or other cells in the interstitial lineage.

623

## 624 **Comparison of linalool to other commonly used anesthetics in *Hydra* research**

625 Whenever one introduces a new tool, it is important to compare performance with existing  
626 methods and demonstrate that the advantages of the new tool are sufficient to make its adoption  
627 worthwhile. While anesthetics were and continue to be most frequently used to relax *Hydra* prior  
628 to fixation for histological and immunohistochemistry studies (Hausman & Burnett 1971; Benos



629 et al. 1977; Mnder et al. 2013; Buzgariu et al. 2018), the advent of modern molecular tools have  
 630 brought with it an increased use for *in vivo* applications (Takahashi & Hamaue 2010; Badhiwala  
 631 et al. 2018; Lommel et al. 2017). Table 1 provides an overview of the various anesthetics that  
 632 have been reported in the literature for use in *Hydra* and examples of their respective  
 633 applications.

634

635 **Table 1. Summary of various anesthetics used to relax *Hydra*.**

| Chemical                   | Working concentration | Application                                                | Treatment duration | Health effects                                        | References                                                                                                 |
|----------------------------|-----------------------|------------------------------------------------------------|--------------------|-------------------------------------------------------|------------------------------------------------------------------------------------------------------------|
| Urethane                   | 2% w/v                | Determination of mechanism of urethane's action            |                    | Hyperextension; potential reversal; structural damage | (Macklin 1976)                                                                                             |
|                            | 1-3% w/v              | Relaxation prior to fixation                               | 2-20 min           | None reported                                         | (Hausman & Burnett 1971; Benos et al. 1977; Buzgariu et al. 2018; Mnder et al. 2013; Shimizu et al. 2002) |
|                            | 2% w/v                | Fluorescence microscopy                                    | Not reported       | None reported                                         | (Takahashi & Hamaue 2010)                                                                                  |
|                            | 5*10 <sup>-2</sup> M  | Inhibition of feeding reaction                             |                    |                                                       | (Loomis 1955)                                                                                              |
| Chlorobutanol (chloretone) | 0.1-0.33% w/v in bath | Reactions to chloretone exposure on 3 <i>Hydra</i> species | several hours      | No apparent damage at low concentrations; habituation | (Kepner & Hopkins 1938)                                                                                    |
|                            | 3*10 <sup>-3</sup> M  | Inhibition of feeding reaction                             | Not reported       | None reported                                         | (Loomis 1955)                                                                                              |
|                            | 0.1% w/v              | Fluorescence imaging                                       | Not reported       | None reported                                         | (Badhiwala et al. 2018; Lommel et al. 2017)                                                                |
| 1-Heptanol                 | 3 mM                  | RNA interference                                           | 10 min @ 4C        | None reported                                         | (Smith et al. 2000)                                                                                        |
|                            | 1% v/v                | Fluorescence microscopy                                    | Not reported       | None reported                                         | (Rentzsch et al. 2005)                                                                                     |
| Magnesium chloride         | 2.5% w/v              | Inhibition of feeding reaction                             | 5 min              | Extensive damage with exposure >1 hr                  | (Carter et al. 2016)                                                                                       |
| Menthol                    | Not reported          | Relaxation prior to fixation                               | Not reported       | None reported                                         | (Hufnagel & Myhal 1977; Hufnagel et al. 1985)                                                              |
|                            | Not reported          | Inhibition of feeding reaction                             | Not reported       | Disintegration                                        | (Carter et al. 2016)                                                                                       |
| MS-222                     | 0.1%                  | Inhibition of feeding reaction                             | Not reported       | None reported                                         | (Loomis 1955)                                                                                              |

636 This table is not a comprehensive summary of all *Hydra* studies that have employed anesthetics but  
 637 provides an overview of examples spanning different chemicals and applications. To the best of our

638 knowledge such a direct comparison has not previously been attempted and thus will be a useful resource  
639 for the field.

640

641 Based on our literature search, the most prominent *in vivo* application of the anesthetics was  
642 fluorescence imaging using urethane, heptanol, or chloretone. We therefore compared linalool to  
643 these anesthetics. To this end we studied whether there were any differences in morphology  
644 when *Hydra* polyps are exposed to the different substances. Although we observed variability  
645 among individual polyps exposed to the same anesthetic at a fixed concentration, both in terms  
646 of morphology and in terms of immobilization speed and strength, polyps assumed characteristic  
647 shapes upon exposure to the different chemicals (Fig. 7A). Following a 15 min exposure, *Hydra*  
648 polyps incubated in 1 mM linalool appear relaxed with tentacles splayed outwards and cone-  
649 shaped hypostomes (Fig 7A i). This morphology does not change significantly by 60 min.  
650 Animals incubated in 0.04% heptanol appear less extended at 15 min, with contracted conical  
651 tentacles. At 60 min the body columns are contracted and the stubby tentacles persist (Fig 7A  
652 ii). Exposure to 2% urethane causes animals to extend and become very thin at 15 min, though  
653 they become swollen while remaining extended by 60 min. (Fig 7A iii). 0.1% chloretone causes  
654 initial extension without the thinness seen in urethane, followed by the formation of swellings  
655 along the body column by 15 min and contraction of both body and tentacles by 60 min (Fig 7 A  
656 iv). To quantify these differences, we calculated average body length of individual animals after  
657 10 min incubation in anesthetic as a percentage of their average length prior to anesthesia (see  
658 Methods). We found that linalool (median, (25<sup>th</sup> percentile, 75<sup>th</sup> percentile) = 103%, (87, 112)),  
659 heptanol (83%, (71, 93)) and urethane (96%, (88, 118)) produce similar anesthetized lengths,  
660 while chloretone (133%, (125, 153)) shows a statistically significant increase in length and some  
661 hyperextended animals (Fig. S4A, D).

662

663 Because most published studies specified only the concentration of anesthetic used and not the  
664 incubation time, we used concentrations that have been reported in the literature to be effective  
665 for the different anesthetics and measured induction and recovery times for direct comparison to  
666 linalool. Overall, the times were fairly similar. Linalool's induction time (9min, (6, 9)) was  
667 similar to that of heptanol (6min, (4, 9)), but significantly longer than those of urethane (5min,  
668 (4, 6)) and chloretone (5min, (3, 7)) (Fig. S4B, E). However, as the average induction time for

669 linalool is below 10 minutes, this is acceptable for routine use. Recovery times were statistically  
670 similar between all anesthetics, with most polyps resuming normal activity within 10-20 min  
671 post-exposure (Fig. S4C, F).

672

673 Finally, we compared the effects of long-term exposure to the different anesthetics. First, we  
674 tested a 3 day exposure to anesthetic without changes of medium, as would be necessary for long  
675 term immobilization for continuous imaging. 1mM linalool does not negatively affect intact  
676 polyps (Fig. 6), but immobilizes them sufficiently to allow continuous imaging of cellular  
677 processes in the intact animal over the course of 3 days. In contrast, all polyps disintegrated  
678 within 24h upon continuous exposure in 2% urethane (Fig. S5A). Under the same conditions,  
679 chloretone caused disintegration in only a small fraction of animals (Fig. S5A). However, the  
680 animals that survived the 3-day chloretone treatment without solution exchange had a fairly  
681 normal morphology and pinch response, potentially due to a developed tolerance, as previously  
682 suggested (Kepner & Hopkins 1938). Heptanol was not lethal to *Hydra* over 3 days (Fig. S5A),  
683 but similar to chloretone the animals regained normal morphology and pinch response by the  
684 third day.

685

686 Subsequently we tested a 3 day incubation with media changes every 24h, to determine whether  
687 performance could be improved by constant refreshing of the anesthetic. Urethane was excluded  
688 from this experiment due to its rapid lethality. Linalool had no impact on survival. Significant  
689 differences were observed in the cases of chloretone and heptanol. Chloretone caused  
690 disintegration of all animals by 48h, whereas heptanol killed ~85% of the treated animals by 72h.  
691 (Fig. S5B)

692

693

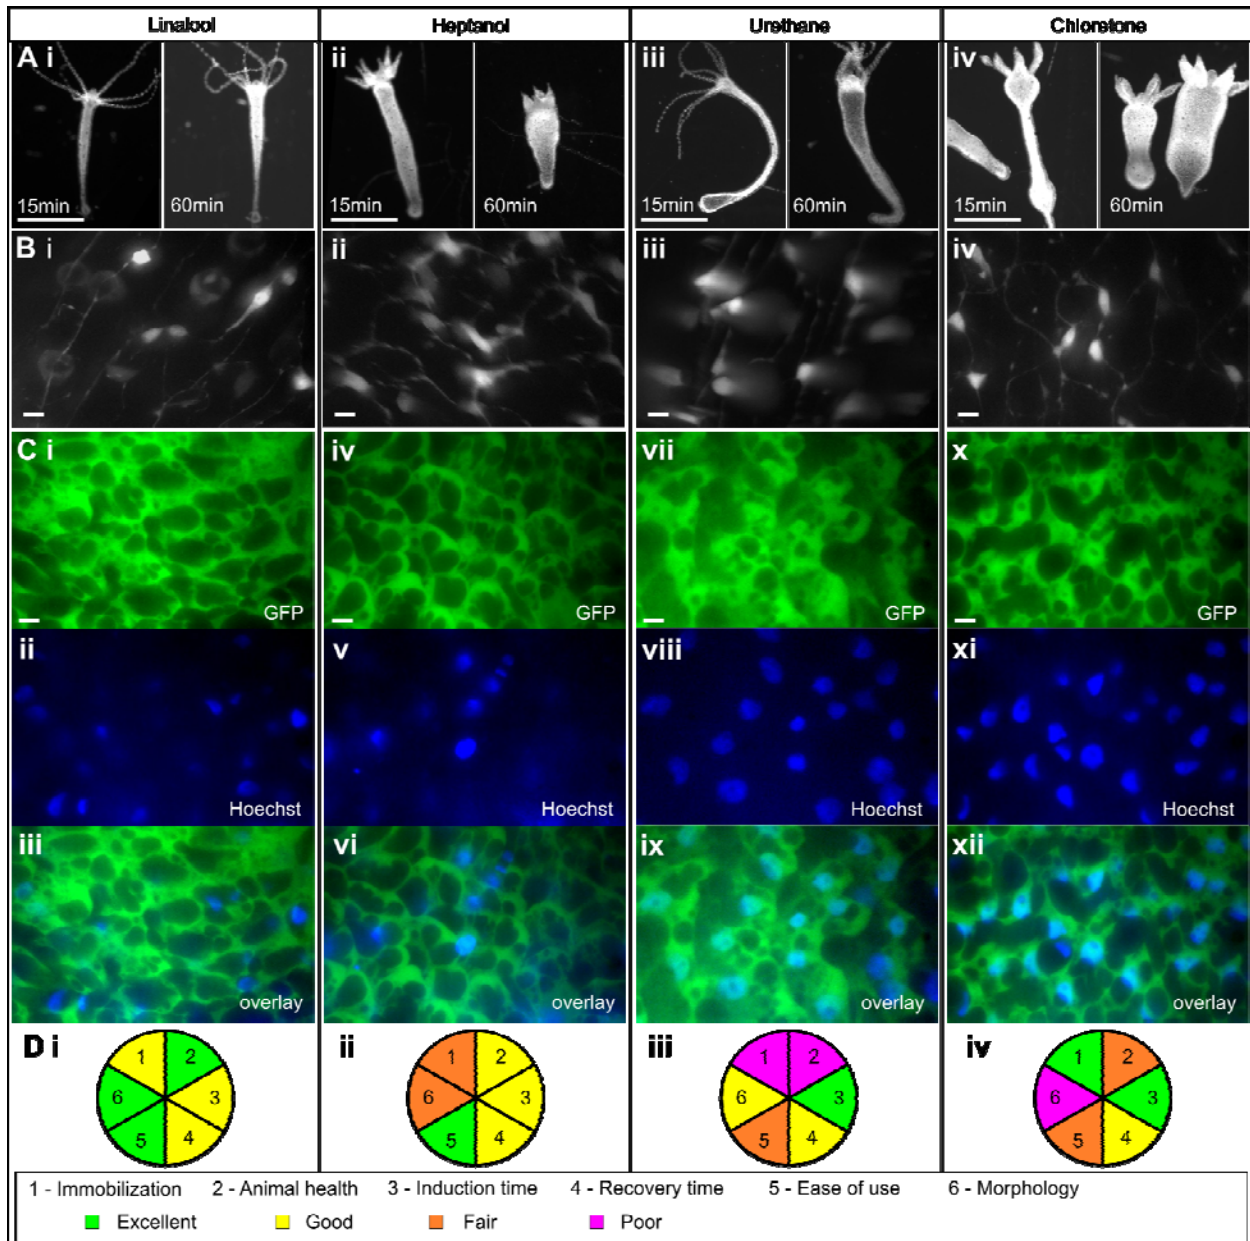

694

695 **Figure 7. Comparison of various *Hydra* anesthetics.** A. Comparisons of the same animal after 15 min

696 and 60 min of anesthetic exposure. i. 1 mM linalool, ii. 0.04% heptanol, iii. 2% urethane, iv. 0.1%

697 chlorotone. Scale bar: 1 mm B. Maximum intensity projections of GCaMP6s animals at 60x

698 magnification in each anesthetic. Scale bars: 10  $\mu$ m C. Maximum intensity projections of two-channel

699 images of watermelon animals stained with Hoechst nuclear dye at 60x magnification. GFP channel,

700 DAPI channel, and merge shown for each anesthetic. Scale bars: 10  $\mu$ m. D. Overview of the four

701 anesthetics tested, scored on degree of immobilization, animal health following anesthesia, time to induce

702 anesthesia, time to recover from anesthesia, and ease of use.

703

704 Finally, we also compared the performance of these various anesthetics for single and dual  
705 channel high magnification fluorescent live imaging of GCaMP6s (Fig. 7B) and WM animals  
706 labeled with Hoechst (Fig. 7C), respectively. While we did not observe a big difference in  
707 stability and image quality across the different conditions as observed earlier when comparing to  
708 animals in HM (Fig. 3), linalool or chloretone exposed animals allowed us to get slightly better  
709 results than animals exposed to heptanol or urethane. For both linalool and chloretone, we were  
710 able to obtain crisp images of neuronal processes without blurring (Fig. 7B i, iv) and the nuclear  
711 staining was better co-localized with the cells (Fig. 7C i, iv). To summarize our direct  
712 comparison of the various anesthetics, linalool has the best overall performance (Fig. 7D),  
713 although chloretone provided better images using short-term high-resolution fluorescence  
714 microscopy.

715

716

## 717 **Discussion**

718 Our results show that linalool is a fast-acting, reversible anesthetic for *Hydra*. It is non-toxic and  
719 simple to use, and its pleasant smell makes working with it an enjoyable experience. Incubation  
720 in 1 mM linalool does not completely immobilize the animal, as we have observed mouth  
721 opening and feeding (Fig. 1F, 4A). The ability of polyps to open their mouths and feed in the  
722 absence of a pinch response suggests that linalool affects primarily the body column. As both  
723 spontaneous and mechanically induced contractions were absent in linalool-exposed polyps,  
724 linalool must affect epitheliomuscular cells.

725

726 In terms of applications, a 10 min incubation in 1 mM linalool significantly decreased polyp  
727 movement, allowing for fine surgical manipulations with superior precision, efficiency, and  
728 long-term success compared to their execution in HM (Fig. 2). Additionally, we achieved  
729 improved fluorescent imaging when compared to HM and were able to acquire good quality  
730 single- and multi-channel fluorescent z-stacks and time lapse movies (Fig.4 and Supplemental  
731 Movies). Furthermore, we showed that linalool enables repeated short-term imaging of the same  
732 specimen over the course of days, allowing us to visualize the dynamics of graft development  
733 and head regeneration in individuals (Fig. 2D and Fig. 5A). We were able to achieve fluorescent

734 imaging with sub-cellular resolution (Fig. 3), which suggests that one could study cellular  
735 migration processes over the course of days.

736

737 When compared to other currently used anesthetics, 1 mM linalool is superior in terms of ease of  
738 preparation, handling, and disposal. Linalool and heptanol are both alcohols and supplied as  
739 liquids. Working concentrations are easily made up fresh within minutes by pipetting the  
740 adequate amount of stock solution. Because heptanol has a strong smell, however, preparation in  
741 the fume hood may be preferred. Urethane and chlorethane are powders and therefore the  
742 preparation of stock solutions requires more time and safety precautions, such as working in a  
743 fume hood. In terms of overall toxicity, linalool is the least harmful substance and considered  
744 non-toxic at the concentrations employed here (Letizia et al. 2003). Chlorethane is also  
745 comparably non-toxic at the concentrations used here (Nordt 1996), whereas urethane is a known  
746 carcinogen (Tuveson & Jacks 1999; Salaman & Roe 1953; Sakano et al. 2002). Heptanol is  
747 considered to have aquatic toxicity (Slooff et al. 1983), has been shown to be a teratogen  
748 (Bernardini et al. 1994), and causes abnormal patterning phenotypes, such as two-headed  
749 animals in freshwater planarians upon long-term low-dose exposure (Nogi & Levin 2005). Thus,  
750 linalool provides a clear advantage in terms of ease of use and lack of toxicity.

751

752 Linalool also has an advantage in anesthetized animal morphology (Fig 7A). Because animals  
753 extend in linalool similar to what is observed in urethane, precision cuts and grafting  
754 experiments are facilitated (Fig. 2); in contrast, animals immobilized in heptanol or chlorethane  
755 appear contracted and misshapen (Fig. 7A ii, iv). As grafting requires precise cuts and  
756 manipulations that are most easily executed on an evenly extended animal, chlorethane and  
757 heptanol are suboptimal for such applications. 1 mM linalool outperforms 2% urethane and  
758 0.04% heptanol for short-term high-magnification fluorescence imaging applications, but  
759 produces a slightly inferior image quality when compared to 0.1% chlorethane (Fig. 6 B,C).  
760 However, the demonstrated lack of cell damage or other harm to the animal may represent an  
761 advantage for repeated imaging or for particularly sensitive experiments.

762

763 In terms of long-term applications, we find that a 3-day continuous exposure without media  
764 exchange is lethal in urethane within 24 h, partially lethal in chlorethane, and harmless in linalool



765 and heptanol. Surviving chloretone and heptanol-treated animals showed normal morphology  
766 and a pinch response. The observed detrimental effect on animal health of urethane may be due  
767 to an overly broad mechanism of action that impacts other aspects of the animal's biology  
768 Urethane has been shown to act in *Hydra* by reversing the sodium polarity across the cell  
769 membrane and to lead to structural damage (Macklin 1976). While chloretone has been  
770 proposed to act directly on nerves (Kepner & Hopkins 1938), its mechanism of action in *Hydra*  
771 remains unclear. It is possible that the gross anatomical changes that are observed in exposure to  
772 chloretone cause functional problems that ultimately cause death. Heptanol is a gap junction  
773 blocker that effectively blocks ectodermal epithelial cell-cell communication in the body column  
774 at 0.04% v/v (Takaku et al. 2015). As a small alcohol, its effect may be lost over long  
775 incubations due to its volatility. Exchanging the media every 24h drastically changed the  
776 outcome of incubation in chloretone and heptanol, with all chloretone-treated and the majority of  
777 heptanol-treated animals dying within 3 days. This result suggests that the survival and loss of  
778 anesthesia seen in animals incubated 72h in heptanol or chloretone without medium changes is  
779 due to evaporation or degradation of the chemical, and that continuous exposure to active  
780 concentrations is toxic to the animals. In summary, these data suggest that urethane, chloretone,  
781 and heptanol cannot be used for continuous 3-day exposure and long-term imaging. Thus,  
782 linalool is the only viable option among the four anesthetics tested for long-term experiments.

783  
784 In contrast to intact polyps, regenerating body columns that were continuously exposed to 1 mM  
785 linalool over 3 days showed negative health effects, including abnormal morphology (Fig. 6E ii),  
786 suppressed regeneration (Fig. 6D), and loss of cells. Both head and foot regeneration were  
787 delayed (Fig. 6D and Fig. S2). Affected animals healed their wounds, but did not develop the  
788 structures associated with the missing body part – decapitated animals did not form tentacles or  
789 hypostomes, and animals lacking feet did not regain a peduncle or the ability to adhere to the  
790 substrate. Regeneration could be rescued by transferring the regenerating animals back to HM  
791 after 3 days of linalool exposure (Fig. 6E). While these findings prevent the use of linalool for  
792 continuous long-term imaging of regeneration, they indicate that linalool could potentially be a  
793 useful tool for regeneration studies if the mechanism of action can be elucidated.

794



795 Because nerve-free animals in linalool do not show delayed regeneration (Fig. S3), these data  
796 suggest that nerve or interstitial cells are the target for the regeneration effect. The precise role of  
797 the interstitial cell lineage in regeneration and morphogenesis is unknown. It has been shown  
798 that nerve-free *Hydra* are fully capable of regeneration and budding (Marcum & Campbell  
799 1978). Marcum and Campbell propose several possible explanations for this observation – 1.  
800 that nerve cells are not involved in development, 2. that nerve cells modulate developmental  
801 processes initiated by epithelial cells, 3. that nerve cells play an essential role in patterning but  
802 that their absence can be compensated for, or 4. that nerve and epithelial cells both have critical  
803 but overlapping roles in development. Head regeneration is delayed in *Hydra* treated with  
804 double-stranded RNA from a gene encoding a neuronal progenitor marker, leading to the idea  
805 that neurons are required for head regeneration (Miljkovic-Licina et al. 2007). The authors take  
806 this result to support the third possibility laid out by Marcum and Campbell – that neurons are  
807 critical for regeneration, but that in their complete absence nerve-free animals can employ an  
808 alternate pathway. Our finding that linalool prevents regeneration in wild type animals while  
809 having no effect on nerve-free animals supports this idea that neuronal signals play an important  
810 role for head regeneration under normal circumstances. It will be exciting to dissect this  
811 relationship between nerve signaling and axial patterning. One possible starting point for  
812 investigation is linalool's known mechanism of action in other systems.

813  
814 Linalool has been found to modify nicotinic receptors at neuromuscular junctions in rodents,  
815 leading to modulated acetylcholine release (Re et al. 2000) and to inhibit glutamatergic signaling  
816 in the central nervous system (Elisabetsky et al. 1995). While it is unclear whether the  
817 mechanism of anesthesia in *Hydra* is the same as that in rodents, the cellular machinery targeted  
818 is sufficiently conserved that this is a possibility. Full characterization of neurotransmitters and  
819 their receptors in *Hydra* has proven elusive thus far but there is still a broad base of evidence for  
820 glutamatergic and cholinergic signaling in *Hydra*. *Hydra* has been shown to possess GABA  
821 receptors (Pierobon et al. 1995), and to have specific glutamate-binding abilities likely  
822 corresponding to at least two types of glutamate receptors (Bellis et al. 1991). GABA,  
823 glutamate, and their agonists and antagonists have been shown to influence behaviors such as  
824 contraction bursts (Kass-Simon et al. 2003), as well as nematocyst activity (Kass-Simon &  
825 Scappaticci 2004). Similarly, *Hydra* homogenate was found to contain an enzyme that

826 hydrolyzes acetylcholine (Eržen & Brzin 1978). Nicotinic acetylcholinesterase antagonists were  
827 found to decrease contraction bursts while a muscarinic acetylcholinergic antagonist increased  
828 them (Kass-Simon & Passano 1978). A cDNA sequence for acetylcholinesterase has also been  
829 cloned, though its expression and localization have not been confirmed (Takahashi & Hamaue  
830 2010) . Thus, linalool’s mechanism of action may be conserved between *Hydra* and rodents,  
831 though further mechanistic studies will be needed to test this hypothesis.

832

833 In summary, linalool offers a range of advantages over other available anesthetics by enabling  
834 new applications such as long term or repeated imaging while also being usable as a pre-fixation  
835 relaxant in the same way as current options. Linalool’s lack of toxicity to both *Hydra* and  
836 researchers and the ease of use and preparation compared to current anesthetics render it an  
837 attractive tool for *Hydra* experimentation in the teaching setting. In particular, linalool makes  
838 grafting experiments that can provide fundamental insights into regeneration and biological  
839 patterning accessible to students with no previous experience with *Hydra*.

840

841

## 842 **Conclusion**

843 The advent of modern biological tools to generate and manipulate transgenic *Hydra* lines has  
844 sparked a new interest in this fascinating model system because it allows for unprecedented *in*  
845 *vivo* studies to dissect the mechanisms underlying regeneration and animal behavior. Here we  
846 introduce linalool as a powerful anesthetic to reliably and reversibly relax *Hydra* tissue or whole  
847 animals and demonstrate its usefulness for *in vivo* tissue manipulation and short-term high-  
848 resolution fluorescent imaging. Linalool outperforms any other currently used anesthetic in ease  
849 of use, lack of toxicity to both the animal and the researcher, and overall performance as a  
850 reversible anesthetic.

851

## 852 **Acknowledgements**

853 The authors thank Trevor Rowe for the creation of the “Frank” animals, Connor Keane for help  
854 with the experiments and data analysis, Dr. Robert Steele and Dr. Danielle Ireland for discussion  
855 and comments on the manuscript, Dr. Nick Kaplinsky for the Syto 60 stain, and Dr. Rafael  
856 Yuste, Dr. Christophe Dupre, and Dr. Alison Hanson for the GCaMP6s and A10 strains.

857

## 858 **Funding**

859 This research was funded by National Science Foundation grant CMMI-1463572, the Research  
860 Corporation for Science Advancement, and the Gordon and Betty Moore foundation.

861

862

863

## 864 **References**

- 865 Ando, H. et al., 1989. Pattern formation in hydra tissue without developmental gradients.  
866 *Developmental Biology*, 133(2), pp.405–414.
- 867 Aprotosoaie, A.C. et al., 2014. Linalool: A review on a key odorant molecule with valuable  
868 biological properties. *Flavour and Fragrance Journal*, 29(4), pp.193–219.
- 869 Badhiwala, K.N. et al., 2018. Microfluidics for electrophysiology, imaging, and behavioral  
870 analysis of Hydra †. , 18, p.2523.
- 871 Bellis, S.L. et al., 1991. Chemoreception in Hydra vulgaris (attenuata): initial characterization of  
872 two distinct binding sites for l-glutamic acid. *Biochimica et Biophysica Acta (BBA) -*  
873 *Biomembranes*, 1061(1), pp.89–94.
- 874 Benos, D.J. et al., 1977. Hyposmotic fluid formation in Hydra. *Tissue and Cell*, 9(1), pp.11–22.
- 875 Bernardini, G. et al., 1994. Lethality, teratogenicity and growth inhibition of heptanol in  
876 Xenopus assayed by a modified frog embryo teratogenesis assay-Xenopus (FETAX)  
877 procedure. *Science of The Total Environment*, 151(1), pp.1–8.
- 878 Bode, H. et al., 1973. Quantitative analysis of cell types during growth and morphogenesis in  
879 Hydra. *Wilhelm Roux Archiv für Entwicklungsmechanik der Organismen*, 171(4), pp.269–  
880 285.
- 881 Bode, H.R., 2012. The head organizer in Hydra. *The International Journal of Developmental*  
882 *Biology*, 56(6-7-8), pp.473–478.
- 883 Bode, H.R., 1996. The interstitial cell lineage of hydra: a stem cell system that arose early in  
884 evolution. *Journal of cell science*, 109, pp.1155–1164.
- 885 Boothe, T. et al., 2017. A tunable refractive index matching medium for live imaging cells,  
886 tissues and model organisms. *eLife - Tools and Resources*.

- 887 Bosch, T.C.G., 2009. Hydra and the evolution of stem cells. *BioEssays*, 31(4), pp.478–486.
- 888 Bosch, T.C.G., 2007. Why polyps regenerate and we don't: Towards a cellular and molecular  
889 framework for Hydra regeneration. *Developmental Biology*, 303(2), pp.421–433.
- 890 Broun, M. & Bode, H.R., 2002. Characterization of the head organizer in hydra. *Development*,  
891 129(4).
- 892 Browne, E.N., 1909. The production of new hydranths in Hydra by the insertion of small grafts.  
893 *Journal of Experimental Zoology*, 7(1), pp.1–23.
- 894 Burnett, A.L. & Diehl, N.A., 1964. The nervous system of hydra. I. Types, distribution and  
895 origin of nerve elements. *Journal of Experimental Zoology*, 157(2), pp.217–226.
- 896 Buzgariu, W. et al., 2018. Impact of cycling cells and cell cycle regulation on Hydra  
897 regeneration. *Developmental Biology*, 433(2), pp.240–253.
- 898 Campbell, R.D., 1974. Cell Movements in Hydra. *American Zoologist*, 14(2), pp.523–535.
- 899 Campbell, R.D. & David, C.N., 1974. Cell Cycle Kinetics and Development of Hydra attenuata.  
900 II. Interstitial cells. *Journal of Cell Science*, 16(2), pp.349–358.
- 901 Carter, J.A. et al., 2016. Dynamics of Mouth Opening in Hydra. *Biophysical Journal*, 110(5),  
902 pp.1191–1201.
- 903 Chapman, J.A. et al., 2010. The dynamic genome of Hydra. *Nature*, 464(7288), pp.592–596.
- 904 Cikalá, M. et al., 1999. Identification of caspases and apoptosis in the simple metazoan Hydra.  
905 *Current Biology*, 9(17), pp.959–S2.
- 906 Cochet-Escartin, O. et al., 2017. Physical Mechanisms Driving Cell Sorting in Hydra.  
907 *Biophysical Journal*, 113(12), pp.2827–2841.
- 908 David, C.N., 1973. A quantitative method for maceration of hydra tissue. *Wilhelm Roux Archiv*  
909 *für Entwicklungsmechanik der Organismen*, 171(4), pp.259–268.
- 910 David, C.N. & Campbell, R.D., 1972. Cell cycle kinetics and development of Hydra attenuata. I.  
911 Epithelial cells. *Journal of Cell Science*, 11(2), pp.557–68.
- 912 David, C.N. & Murphy, S., 1977. Characterization of interstitial stem cells in hydra by cloning.  
913 *Developmental Biology*, 58(2), pp.372–383.
- 914 Dupre, C. & Yuste, R., 2017. Non-overlapping Neural Networks in Hydra vulgaris. *Current*  
915 *Biology*, 27(8), pp.1085–1097.
- 916 Elisabetsky, E., Marschner, J. & Onofre Souza, D., 1995. Effects of linalool on glutamatergic  
917 system in the rat cerebral cortex. *Neurochemical Research*, 20(4), pp.461–465.

- 918 Engel, U. et al., 2002. Nowa, a novel protein with minicollagen Cys-rich domains, is involved in  
919 nematocyst formation in Hydra. *Journal of cell science*, 115(Pt 20), pp.3923–34.
- 920 Eržen, I. & Brzin, M., 1978. Cholinergic mechanisms in hydra. *Comparative Biochemistry and*  
921 *Physiology Part C: Comparative Pharmacology*, 59(1), pp.39–43.
- 922 Fujisawa, T., 2003. Hydra regeneration and epitheliopeptides. *Developmental Dynamics*, 226(2),  
923 pp.182–189.
- 924 Galliot, B. et al., 2018. Non-developmental dimensions of adult regeneration in Hydra. *The*  
925 *International journal of developmental biology*, 62(6-7-8), pp.373–381.
- 926 Gierer, A. et al., 1972. Regeneration of Hydra from Reaggregated Cells. *Nature New Biology*,  
927 239(91), pp.98–101.
- 928 Gierer, A. & Meinhardt, H., 1972. A Theory of Biological Pattern Formation. *Kybernetik*, 12,  
929 pp.30–39.
- 930 Glauber, K.M. et al., 2013. A small molecule screen identifies a novel compound that induces a  
931 homeotic transformation in Hydra. *Development (Cambridge, England)*, 140(23), pp.4788–  
932 96.
- 933 Glauber, K.M. et al., 2015. A small molecule screen identifies a novel compound that induces a  
934 homeotic transformation in Hydra. *Development*, 142(11), pp.2081–2081.
- 935 Hagstrom, D. et al., 2015. Freshwater Planarians as an Alternative Animal Model for  
936 Neurotoxicology. *Toxicological Sciences*, 147(1), pp.270–285.
- 937 Han, S. et al., 2018. Comprehensive machine learning analysis of Hydra behavior reveals a  
938 stable basal behavioral repertoire. *eLife*, 7.
- 939 Hausman, R.E. & Burnett, A.L., 1971. The mesoglea of Hydra. IV. A qualitative  
940 radioautographic study of the protein component. *Journal of Experimental Zoology*, 177(4),  
941 pp.435–446.
- 942 Heldwein, C.G. et al., 2014. S-(+)-Linalool from *Lippia alba*: Sedative and anesthetic for silver  
943 catfish (*Rhamdia quelen*). *Veterinary Anaesthesia and Analgesia*, 41(6), pp.621–629.
- 944 Hobmayer, B. et al., 2000. WNT signalling molecules act in axis formation in the diploblastic  
945 metazoan Hydra. *Nature*, 407(6801), pp.186–189.
- 946 Höferl, M., Krist, S. & Buchbauer, G., 2006. Chirality Influences the Effects of Linalool on  
947 Physiological Parameters of Stress. *Planta Medica*, 72(13), pp.1188–1192.
- 948 Hufnagel, L.A., Kass-Simon, G. & Lyon, M.K., 1985. Functional organization of battery cell

- 949 complexes in tentacles of *Hydra attenuata*. *Journal of Morphology*, 184(3), pp.323–341.
- 950 Hufnagel, L.A. & Myhal, M.L., 1977. Observations on a Spirochaete Symbiotic in *Hydra*.
- 951 *Transactions of the American Microscopical Society*, 96(3), p.406.
- 952 Juliano, C.E., Lin, H. & Steele, R.E., 2014. Generation of Transgenic *Hydra* by Embryo
- 953 Microinjection. *Journal of Visualized Experiments*, 91, p.e51888.
- 954 Kass-Simon, G., Pannaccione, A. & Pierobon, P., 2003. GABA and glutamate receptors are
- 955 involved in modulating pacemaker activity in *hydra*. *Comparative Biochemistry and*
- 956 *Physiology - A Molecular and Integrative Physiology*, 136(2), pp.329–342.
- 957 Kass-Simon, G. & Passano, L.M., 1978. A neuropharmacological analysis of the pacemakers and
- 958 conducting tissues of *Hydra attenuata*. *Journal of Comparative Physiology* □ ? A, 128(1),
- 959 pp.71–79.
- 960 Kass-Simon, G. & Scappaticci, A.A., 2004. Glutamatergic and GABAnergic control in the
- 961 tentacle effector systems of *Hydra vulgaris*. *Hydrobiologia*, 530–531(1–3), pp.67–71.
- 962 Kepner, W.A. & Hopkins, D.L.L., 1938. Reactions of *Hydra* to Chloretone. *Journal of*
- 963 *Experimental Zoology*, 38(c), pp.951–959.
- 964 Koizumi, O., 2002. Developmental neurobiology of *hydra*, a model animal of cnidarians.
- 965 *Canadian Journal of Zoology*, 80(10), pp.1678–1689.
- 966 Lenhoff, H.M. & Brown, R.D., 1970. Mass culture of *hydra*: an improved method and its
- 967 application to other aquatic invertebrates. *Laboratory Animals*, 4(1), pp.139–154.
- 968 Lenhoff, S.G. & Lenhoff, H.M., 1986. *Hydra and the Birth of Experimental Biology - 1744*,
- 969 Letizia, C.. et al., 2003. Fragrance material review on linalool. *Food and Chemical Toxicology*,
- 970 41(7), pp.943–964.
- 971 Linck, V. de M. et al., 2009. Inhaled linalool-induced sedation in mice. *Phytomedicine*, 16(4),
- 972 pp.303–307.
- 973 Livshits, A. et al., 2017. Structural Inheritance of the Actin Cytoskeletal Organization
- 974 Determines the Body Axis in Regenerating *Hydra*. *Cell Reports*, 18(6), pp.1410–1421.
- 975 Lommel, M. et al., 2017. Genetic knockdown and knockout approaches in *Hydra*. *bioRxiv*.
- 976 Loomis, W.F., 1955. GLUTATHIONE CONTROL OF THE SPECIFIC FEEDING
- 977 REACTIONS OF *HYDRA*. *Annals of the New York Academy of Sciences*, 62(9 Gluathione
- 978 Co), pp.211–227.
- 979 Macklin, M., 1976. The effect of urethan on *hydra*. *The Biological bulletin*, 150(3), pp.442–52.



- 980 MacWilliams, H.K., 1983. Hydra transplantation phenomena and the mechanism of Hydra head  
981 regeneration: II. Properties of the head activation. *Developmental Biology*, 96(1), pp.239–  
982 257.
- 983 Marcum, B.A. & Campbell, R.D., 1978. Development of Hydra lacking nerve and interstitial  
984 cells. *Journal of Cell Science*, 29(1).
- 985 Martin, V.J. et al., 1997. Embryogenesis in hydra. *The Biological bulletin*, 192(3), pp.345–63.
- 986 Miljkovic-Licina, M. et al., 2007. Head regeneration in wild-type hydra requires de novo  
987 neurogenesis. *Development (Cambridge, England)*, 134(6), pp.1191–201.
- 988 Münder, S. et al., 2013. Notch-signalling is required for head regeneration and tentacle  
989 patterning in Hydra. *Developmental Biology*, 383(1), pp.146–157.
- 990 Nogi, T. & Levin, M., 2005. Characterization of innexin gene expression and functional roles of  
991 gap-junctional communication in planarian regeneration. *Developmental Biology*, 287(2),  
992 pp.314–335.
- 993 Nordt, S.P., 1996. Chlorobutanol toxicity. *The Annals of pharmacotherapy*, 30(10), pp.1179–80.
- 994 Noro, Y. et al., 2019. Regionalized nervous system in Hydra and the mechanism of its  
995 development. *Gene Expression Patterns*, 31, pp.42–59.
- 996 Otto, J.J. & Campbell, R.D., 1977. Budding in Hydra attenuata: Bud stages and fate map. *Journal*  
997 *of Experimental Zoology*, 200(3), pp.417–428.
- 998 Petersen, H.O. et al., 2015. A Comprehensive Transcriptomic and Proteomic Analysis of Hydra  
999 Head Regeneration. *Molecular Biology and Evolution*, 32(8), pp.1928–1947.
- 1000 Pierobon, P. et al., 1995. Biochemical and functional identification of GABA receptors in Hydra  
1001 vulgaris. *Life Sciences*, 56(18), pp.1485–1497.
- 1002 Rand, H.W., Bovard, J.F. & Minnich, D.E., 1926. Localization of Formative Agencies in Hydra.  
1003 *Proceedings of the National Academy of Sciences of the United States of America*, 12(9),  
1004 pp.565–70.
- 1005 Re, L. et al., 2000. Linalool modifies the nicotinic receptor-ion channel kinetics at the mouse  
1006 neuromuscular junction. *Pharmacological Research*, 42(2), pp.177–181.
- 1007 Rentzsch, F., Hobmayer, B. & Holstein, T.W., 2005. Glycogen synthase kinase 3 has a  
1008 proapoptotic function in Hydra gametogenesis. *Developmental Biology*, 278(1), pp.1–12.
- 1009 Rodenak-Kladniew, B. et al., 2018. Linalool induces cell cycle arrest and apoptosis in HepG2  
1010 cells through oxidative stress generation and modulation of Ras/MAPK and Akt/mTOR



- 1011 pathways. *Life Sciences*, 199(February), pp.48–59.
- 1012 Sakano, K. et al., 2002. Metabolism of carcinogenic urethane to nitric oxide is involved in  
1013 oxidative DNA damage. *Free Radical Biology and Medicine*, 33(5), pp.703–714.
- 1014 Salaman, M.H. & Roe, F.J., 1953. Incomplete carcinogens: ethyl carbamate (urethane) as an  
1015 initiator of skin tumour formation in the mouse. *British journal of cancer*, 7(4), pp.472–81.
- 1016 Schindelin, J. et al., 2012. Fiji: an open-source platform for biological-image analysis. *Nature*  
1017 *Methods*, 9(7), pp.676–682.
- 1018 Shimizu, H. et al., 2002. Epithelial morphogenesis in hydra requires de novo expression of  
1019 extracellular matrix components and matrix metalloproteinases. *Development*, 129(6),  
1020 p.1521 LP-1532.
- 1021 Shimizu, H., Koizumi, O. & Fujisawa, T., 2004a. Three digestive movements in Hydra regulated  
1022 by the diffuse nerve net in the body column. *Journal of Comparative Physiology A*, 190(8),  
1023 pp.623–630.
- 1024 Shimizu, H., Koizumi, O. & Fujisawa, T., 2004b. Three digestive movements in Hydra regulated  
1025 by the diffuse nerve net in the body column. *Journal of Comparative Physiology A*, 190(8),  
1026 pp.623–630.
- 1027 Shimizu, H. & Sawada, Y., 1987. Transplantation phenomena in hydra: Cooperation of position-  
1028 dependent and structure-dependent factors determines the transplantation result.  
1029 *Developmental Biology*, 122(1), pp.113–119.
- 1030 Shimizu, H., Sawada, Y. & Sugiyama, T., 1993. Minimum Tissue Size Required for Hydra  
1031 Regeneration. *Developmental Biology*, 155(2), pp.287–296.
- 1032 Siebert, S. et al., 2018. Stem cell differentiation trajectories in Hydra resolved at single-cell  
1033 resolution. *bioRxiv*, p.460154.
- 1034 Slooff, W., Canton, J.H. & Hermens, J.L.M., 1983. Comparison of the susceptibility of 22  
1035 freshwater species to 15 chemical compounds. I. (Sub)acute toxicity tests. *Aquatic*  
1036 *Toxicology*, 4(2), pp.113–128.
- 1037 Smith, K.M., Gee, L. & Bode, H.R., 2000. HyAlx, an aristaless-related gene, is involved in  
1038 tentacle formation in hydra. *Development*, 127(22).
- 1039 Steele, R.E., 2002. Developmental Signaling in Hydra: What Does It Take to Build a “Simple”  
1040 Animal? *Developmental Biology*, 248(2), pp.199–219.
- 1041 Sugiyama, T. & Fujisawa, T., 1978. Genetic analysis of developmental mechanisms in Hydra. II.

- 1042 Isolation and characterization of an interstitial cell-deficient strain. *Journal of cell science*,  
1043 29, pp.35–52.
- 1044 Takahashi, T. & Hamaue, N., 2010. Molecular characterization of Hydra acetylcholinesterase  
1045 and its catalytic activity. *FEBS Letters*, 584(3), pp.511–516.
- 1046 Takaku, Y. et al., 2015. Innexin gap junctions in nerve cells coordinate spontaneous contractile  
1047 behavior in Hydra polyps. *Scientific Reports*, 4(1), p.3573.
- 1048 Technau, U. et al., 2003. Arrested apoptosis of nurse cells during Hydra oogenesis and  
1049 embryogenesis. *Developmental Biology*, 260(1), pp.191–206.
- 1050 Technau, U. et al., 2000. Parameters of self-organization in Hydra aggregates. *Proceedings of the*  
1051 *National Academy of Sciences of the United States of America*, 97(22), pp.12127–31.
- 1052 Thévenaz, P., Ruttimann, U.E. & Unser, M., 1998. A Pyramid Approach to Subpixel  
1053 Registration Based on Intensity. *IEEE Transactions on Image Processing*, 7(1), pp.27–41.
- 1054 Tran, C.M. et al., 2017. Generation and long-term maintenance of nerve-free Hydra. *J. Vis. Exp.*,  
1055 125, p.e56115.
- 1056 Tuveson, D.A. & Jacks, T., 1999. Modeling human lung cancer in mice: similarities and  
1057 shortcomings. *Oncogene*, 18(38), pp.5318–5324.
- 1058 Wittlieb, J. et al., 2006. Transgenic Hydra allow in vivo tracking of individual stem cells during  
1059 morphogenesis. *Proceedings of the National Academy of Sciences*.
- 1060 Yao, T., 1945. Studies on the Organizer Problem in Pelmatohydra Oligactis. *Journal of*  
1061 *Experimental Biology*, 21(3–4).
- 1062
- 1063
